# Supplementary material for: Naa12 compensates for Naa10 in mice in the amino-terminal acetylation pathway
Source: eLife journal article supplement (doi:10.7554/elife.65952), 2021-08-06
Supplement: supp [file elife-65952-supp-v1.zip]

Archive with 26 entries (26 files):
- elife_poa_e65952_Figure_1_figure_supplement_1.pdf
- elife_poa_e65952_Figure_1_figure_supplement_2.pdf
- elife_poa_e65952_Figure_1_figure_supplement_1_source_data_1.pdf
- elife_poa_e65952_Figure_1_figure_supplement_1_source_data_2.pdf
- elife_poa_e65952_Figure_1_figure_supplement_1_source_data_3.pdf
- elife_poa_e65952_Figure_2_figure_supplement_1.pdf
- elife_poa_e65952_Figure_2_figure_supplement_2.pdf
- elife_poa_e65952_Figure_3_figure_supplement_1.pdf
- elife_poa_e65952_Figure_3_source_data_1.pdf
- elife_poa_e65952_Figure_3_figure_supplement_1_source_data_1.pdf
- elife_poa_e65952_Figure_4_figure_supplement_1.pdf
- elife_poa_e65952_Figure_4_figure_supplement_2.pdf
- elife_poa_e65952_Figure_4_source_data_1.pdf
- elife_poa_e65952_Figure_4_figure_supplement_1_source_data_1.pdf
- elife_poa_e65952_Figure_4_figure_supplement_1_source_data_2.pdf
- elife_poa_e65952_Figure_4_figure_supplement_1_source_code_1.pdf
- elife_poa_e65952_Figure_4_figure_supplement_1_source_code_2.pdf
- elife_poa_e65952_Figure_5_source_data_1.pdf
- elife_poa_e65952_Figure_6_figure_supplement_1.pdf
- elife_poa_e65952_Figure_6_figure_supplement_2.pdf
- elife_poa_e65952_Figure_6_figure_supplement_3.pdf
- elife_poa_e65952_Figure_6_figure_supplement_4.pdf
- elife_poa_e65952_Figure_6_figure_supplement_5.pdf
- elife_poa_e65952_Supplementary_file_1.docx
- elife_poa_e65952_Supplementary_file_2.xlsx
- elife_poa_e65952_Transparent_Reporting_File.docx
