# Supplementary material for: Naa12 compensates for Naa10 in mice in the amino-terminal acetylation pathway
Source: eLife journal article supplement (doi:10.7554/elife.65952), 2021-08-06
Supplement: supp [file elife-65952-supp-v1.zip]

GENE®

Nac10

— +/Y +mla/Y —

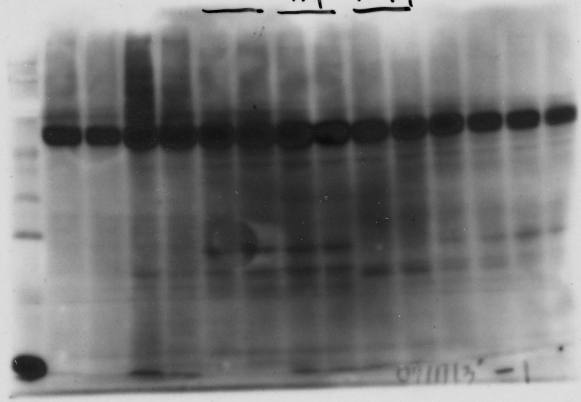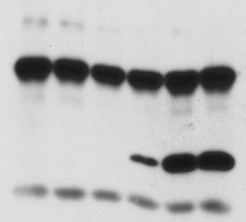

STRATA
