# Supplementary material for: Naa12 compensates for Naa10 in mice in the amino-terminal acetylation pathway
Source: eLife journal article supplement (doi:10.7554/elife.65952), 2021-08-06
Supplement: supp [file elife-65952-supp-v1.zip › elife_poa_e65952_Figure_1_figure_supplement_1_source_data_3.pdf]

0/19/12

MYC

MYC

Flag

Flag

MYC

Flag

Flag

FLAG

0/19/12

0/19/12

MSD CH-50 NEW PROBEK
