# Supplementary figures and images for: Naa12 compensates for Naa10 in mice in the amino-terminal acetylation pathway
Source: eLife journal article supplement (doi:10.7554/elife.65952), 2021-08-06

**Figure 6\_supplement  
figure 3**

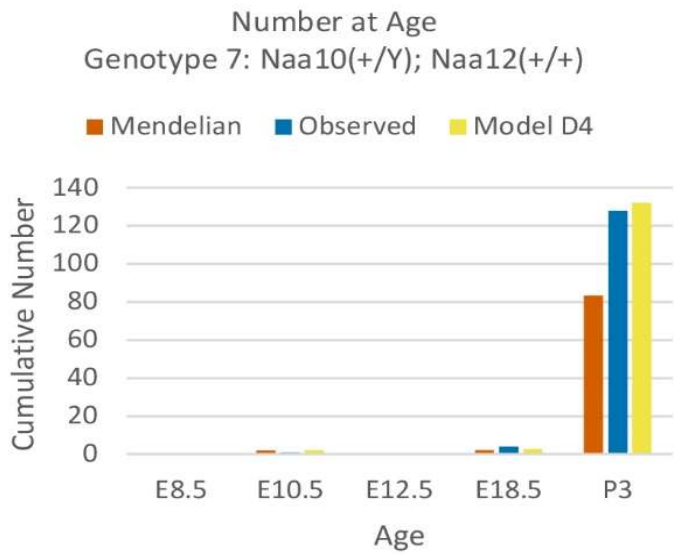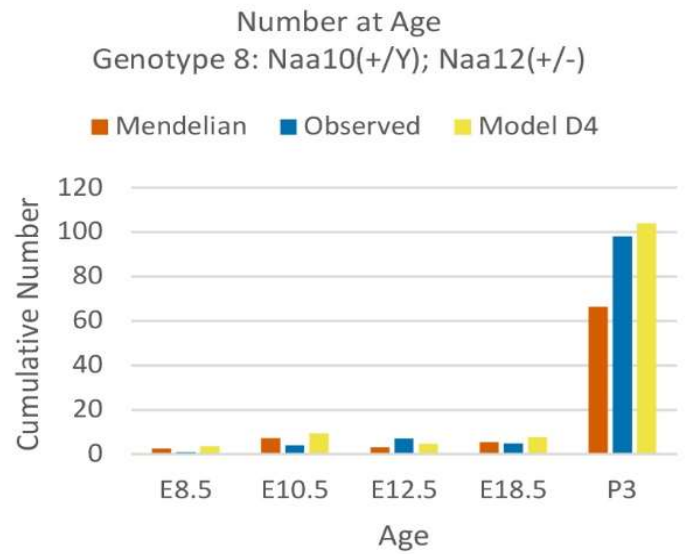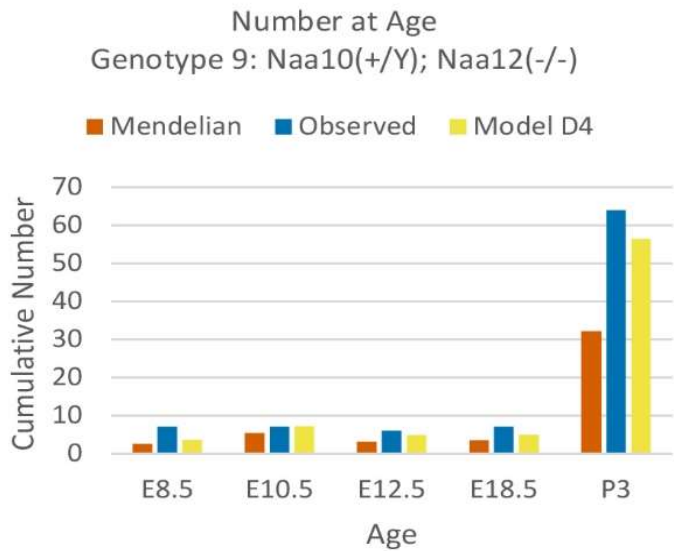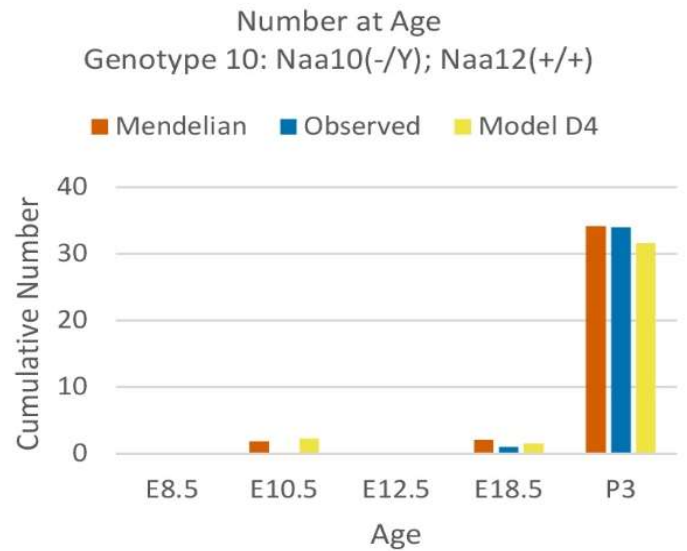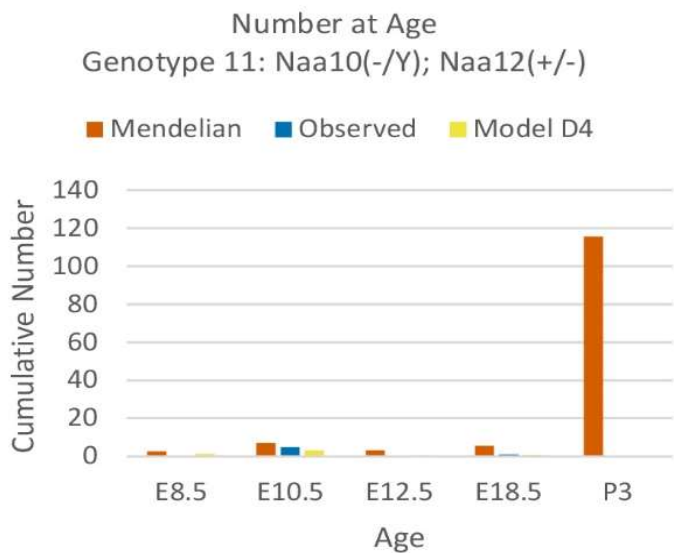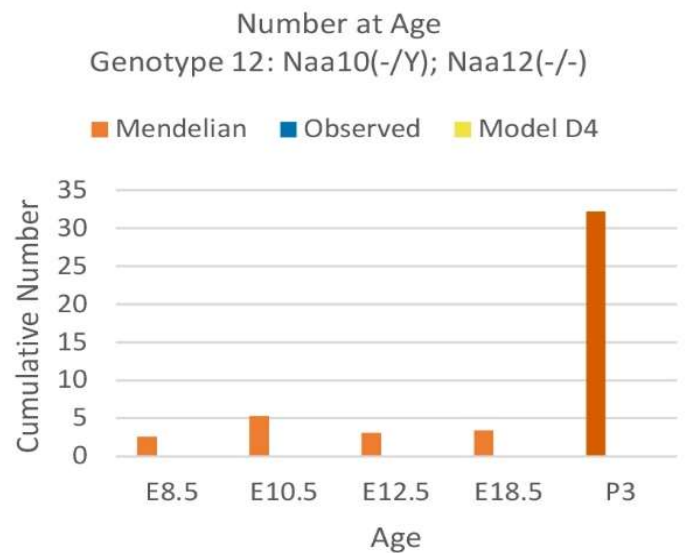

Supplement: supp [file elife-65952-supp-v1.zip]

**Figure 4\_supplement  
figure 2**

**A**

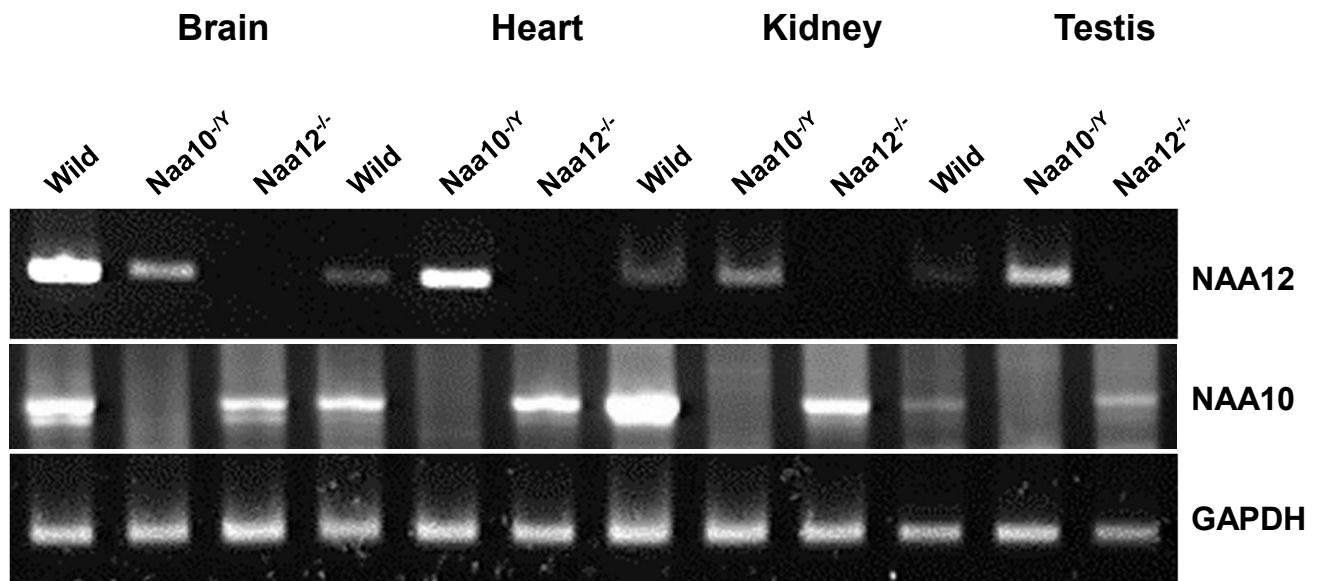

**B**

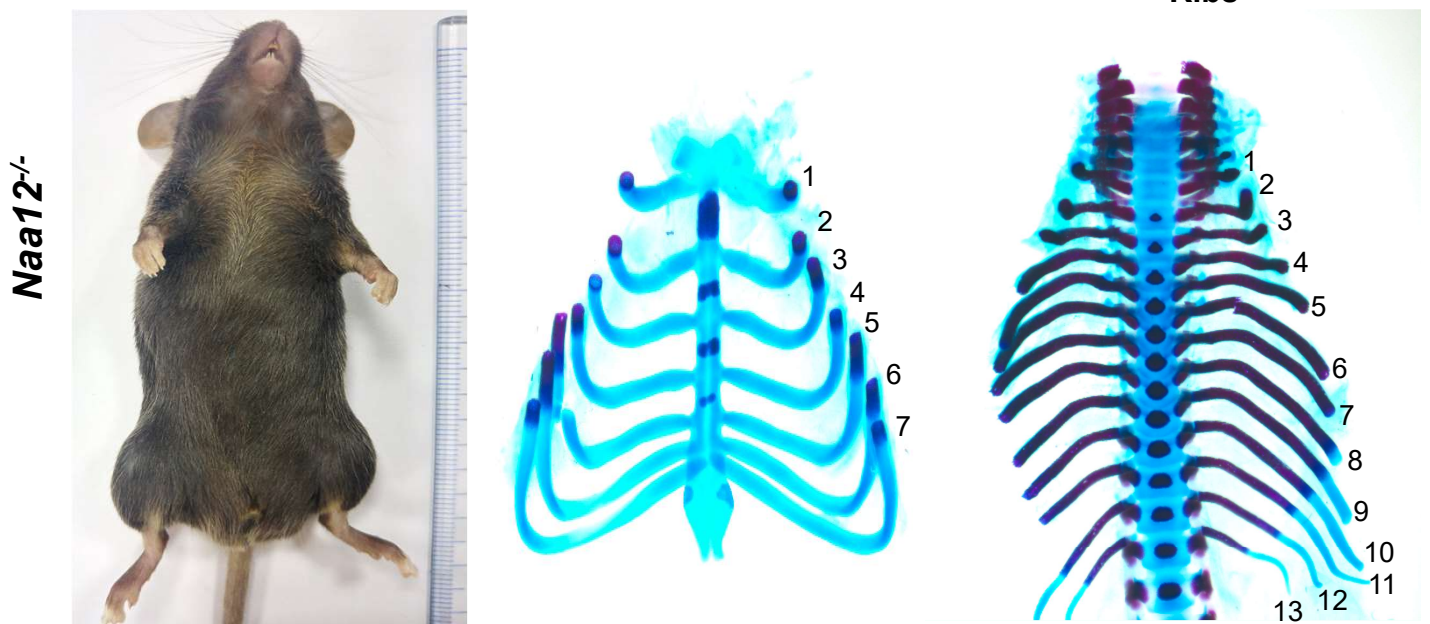

Supplement: supp [file elife-65952-supp-v1.zip]

Figure 1\_Figure Supplement 2

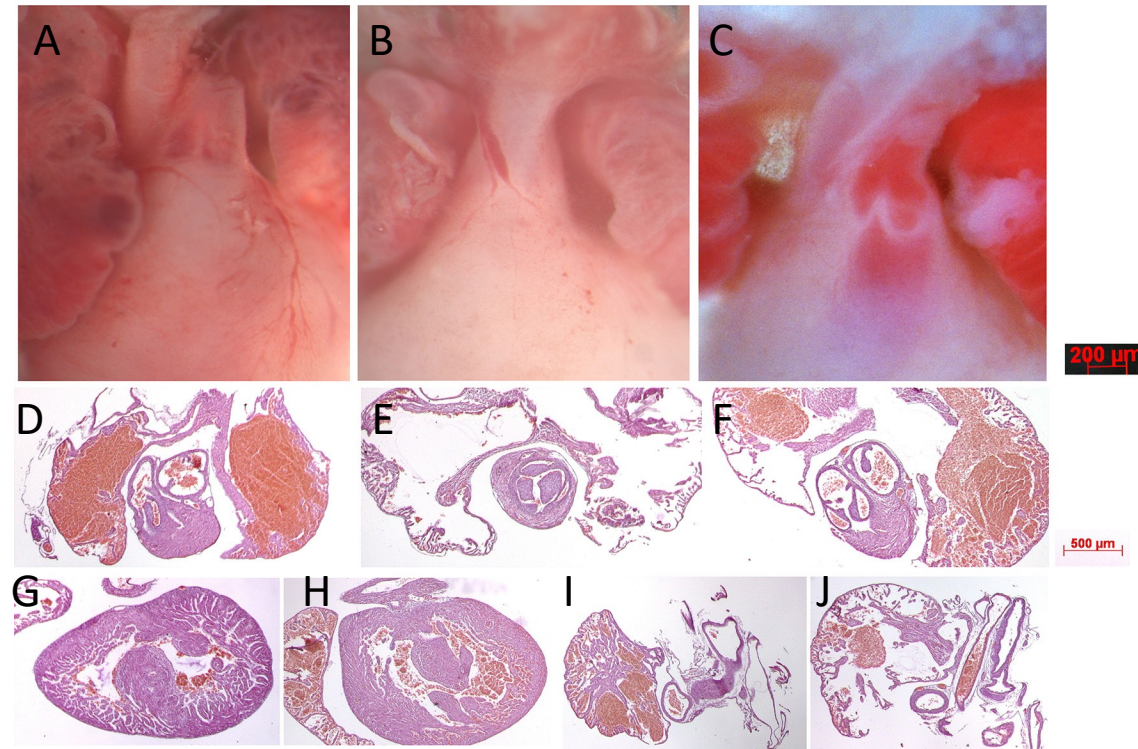

Supplement: supp [file elife-65952-supp-v1.zip]

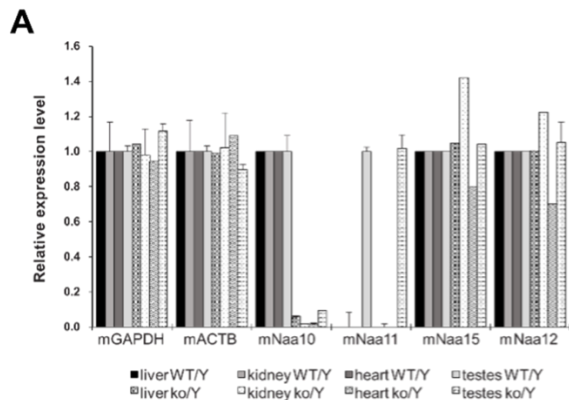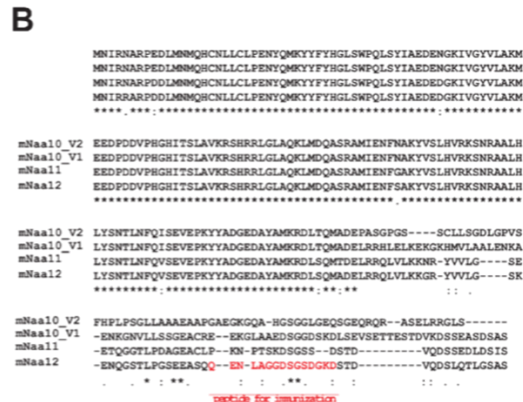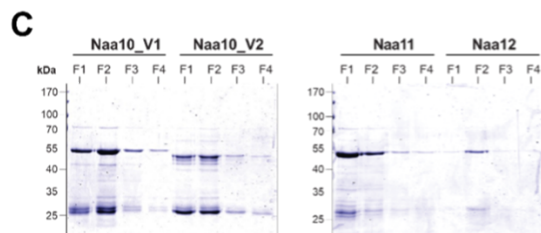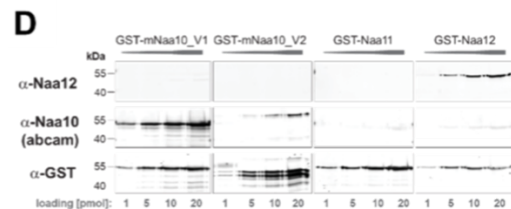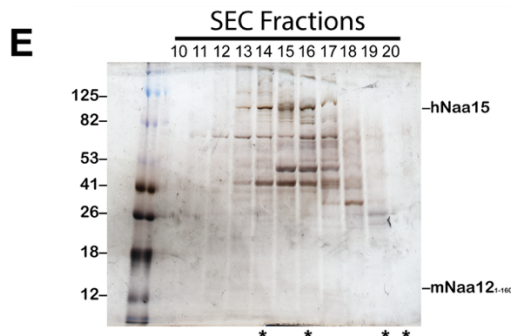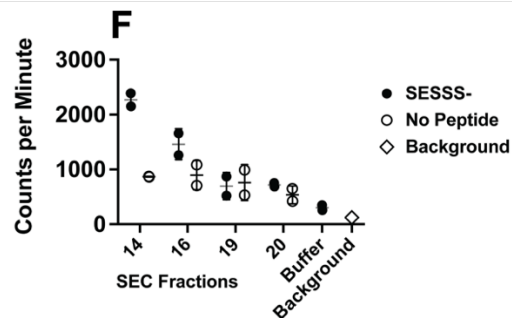

Supplement: supp [file elife-65952-supp-v1.zip]

# Figure 3\_figure supplement 1

**A**

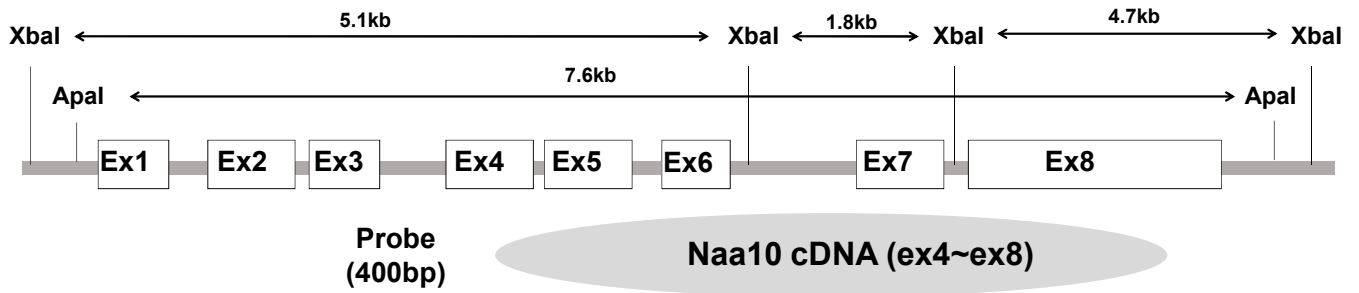

**B**

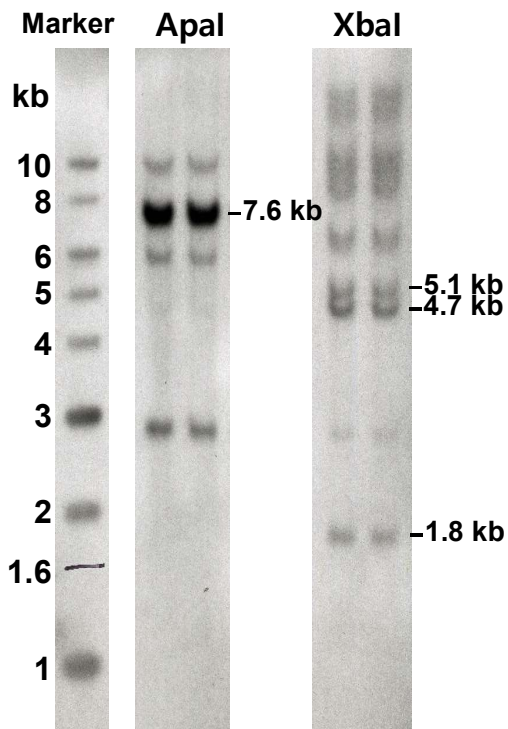

**C**

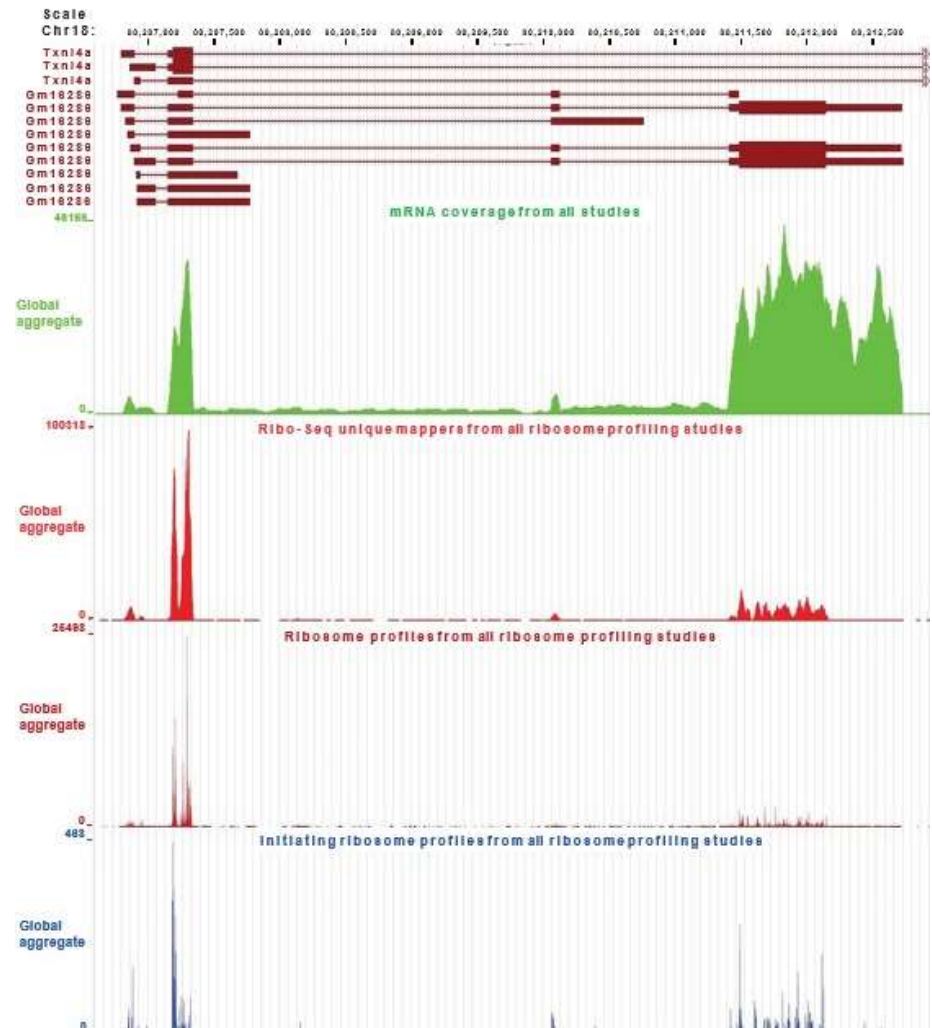

Supplement: supp [file elife-65952-supp-v1.zip]

**Figure 1\_figure  
supplement 1**

**A**

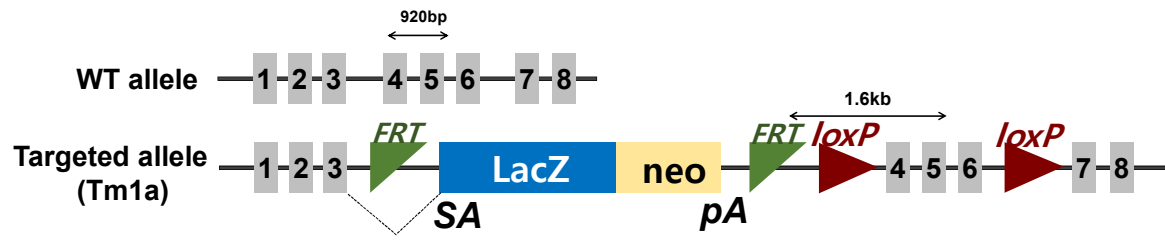

**B**

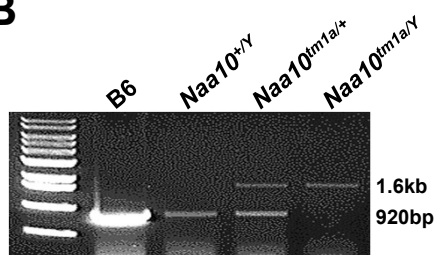

**C Kidney**

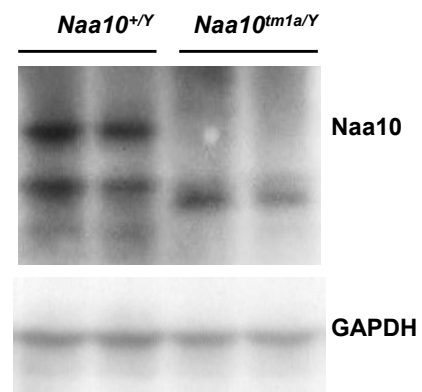

**D**

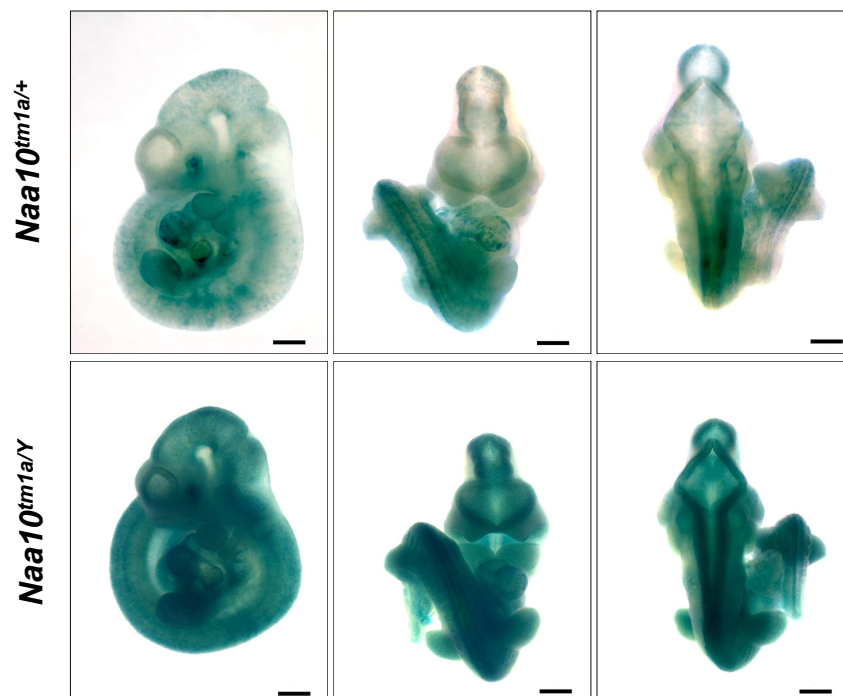

Supplement: supp [file elife-65952-supp-v1.zip › elife_poa_e65952_Figure_1_figure_supplement_1.pdf]

GENE®

Nac10

— +/Y +mla/Y —

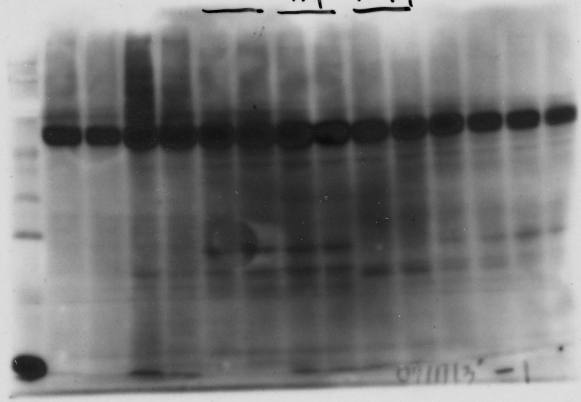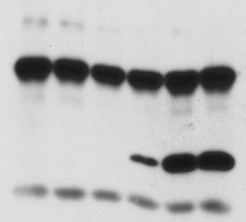

STRATA

Supplement: supp [file elife-65952-supp-v1.zip › elife_poa_e65952_Figure_1_figure_supplement_1_source_data_1.pdf]

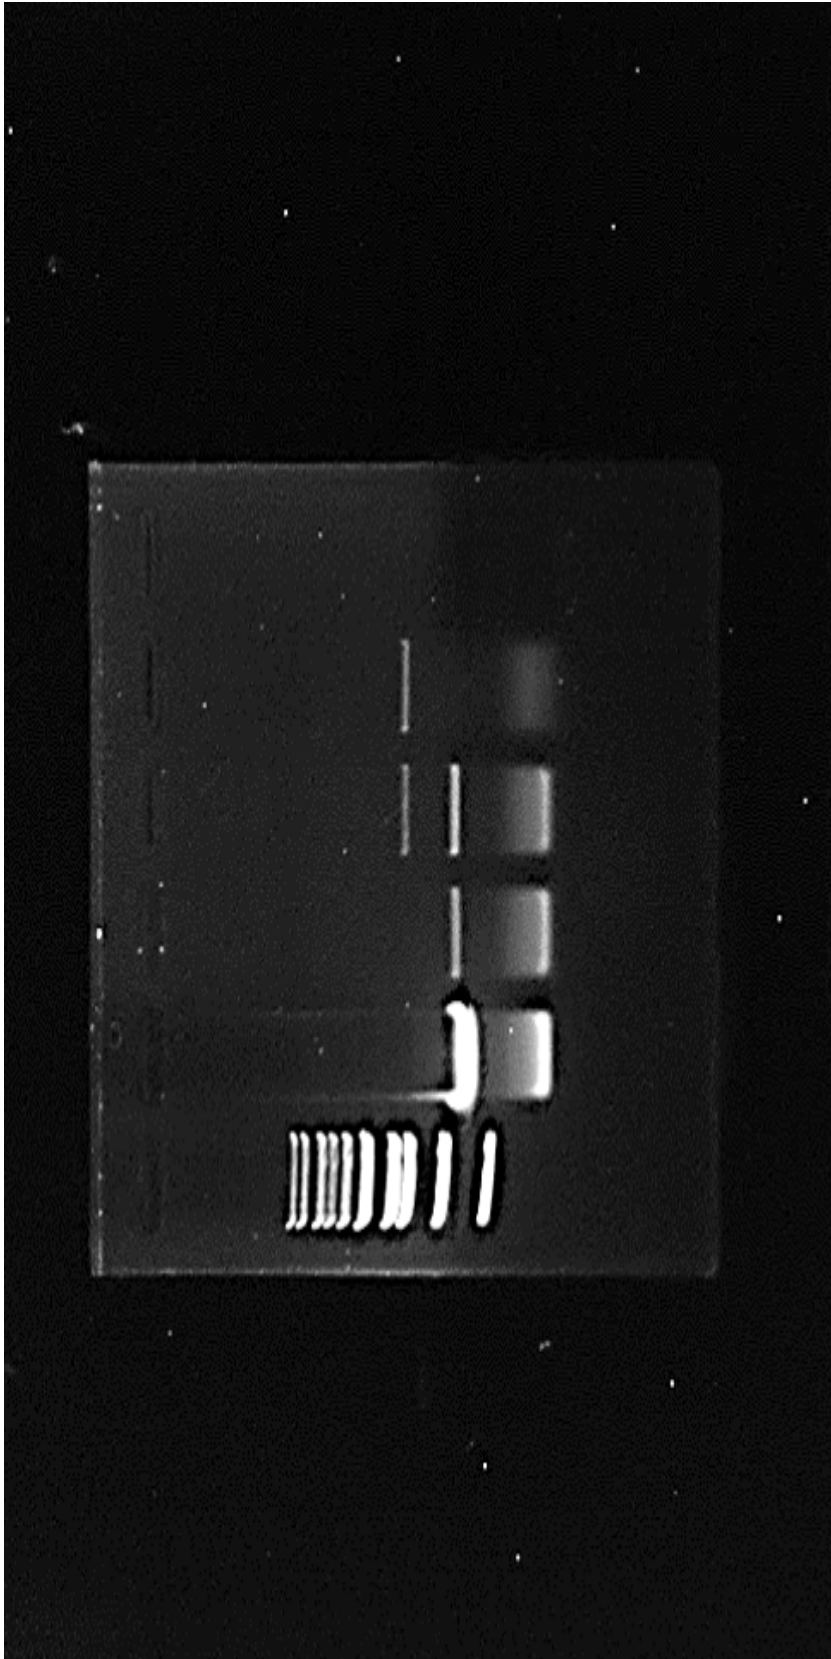

Supplement: supp [file elife-65952-supp-v1.zip › elife_poa_e65952_Figure_1_figure_supplement_1_source_data_2.pdf]

**Figure 2\_supplement  
figure 1**

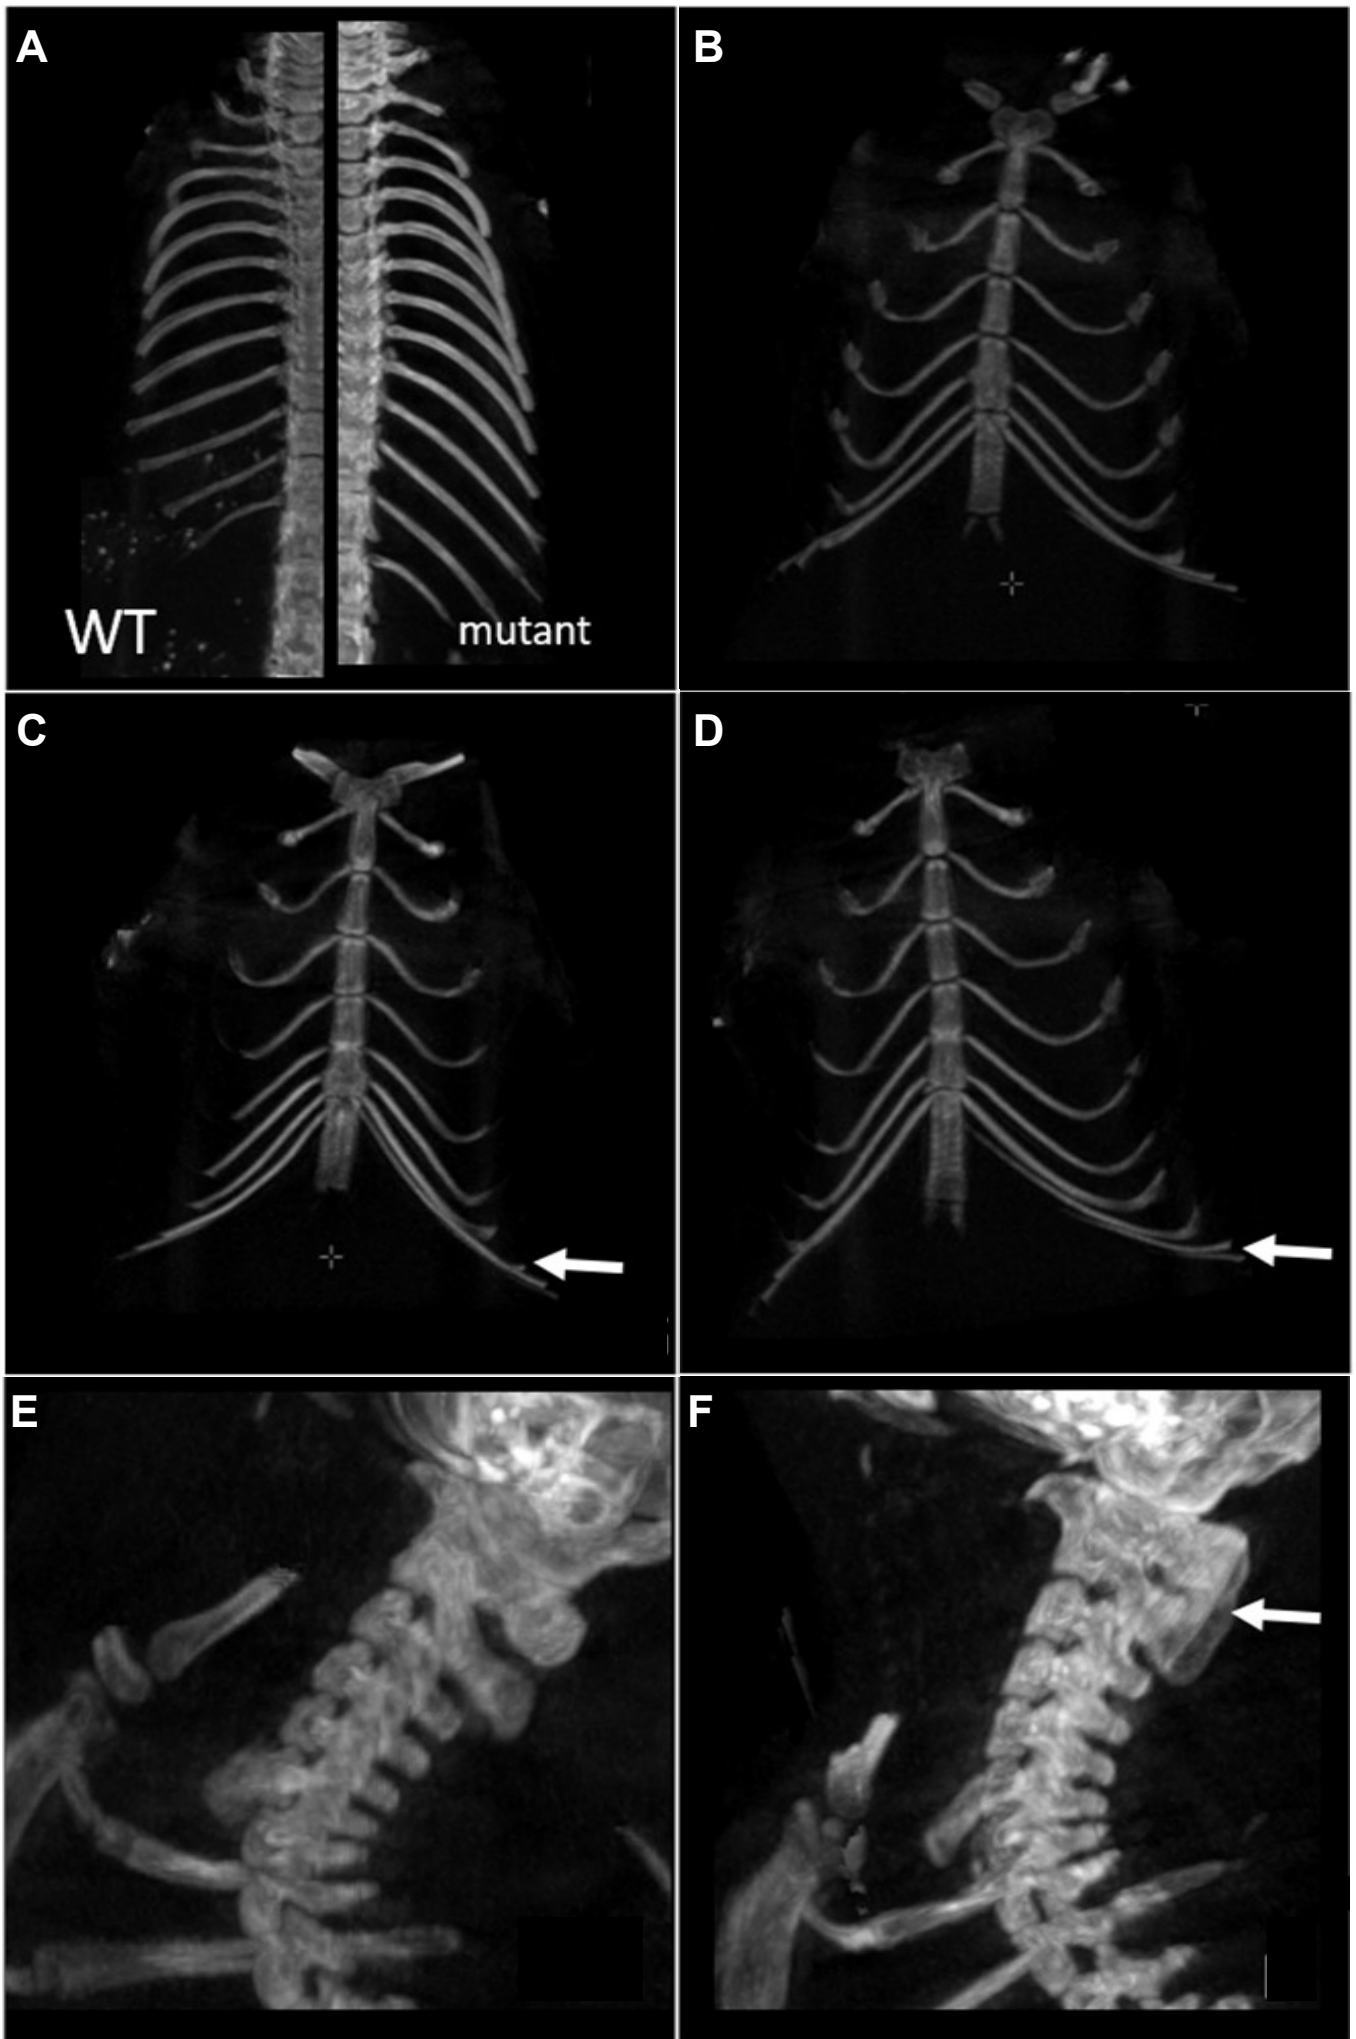

Supplement: supp [file elife-65952-supp-v1.zip › elife_poa_e65952_Figure_2_figure_supplement_1.pdf]

**A**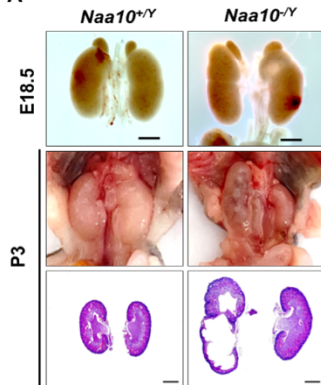**C**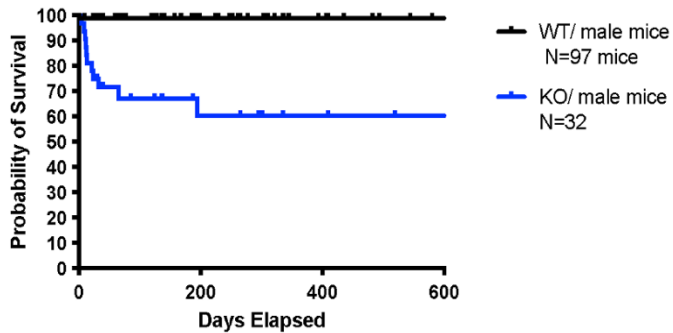**B**

Male KO mouse but no hydrocephaly      Male KO mouse with hydrocephaly

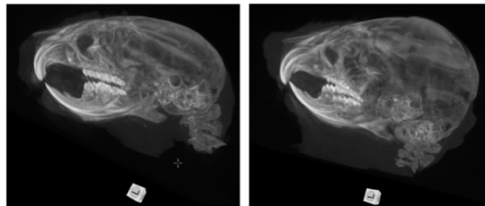

Supplement: supp [file elife-65952-supp-v1.zip › elife_poa_e65952_Figure_2_figure_supplement_2.pdf]

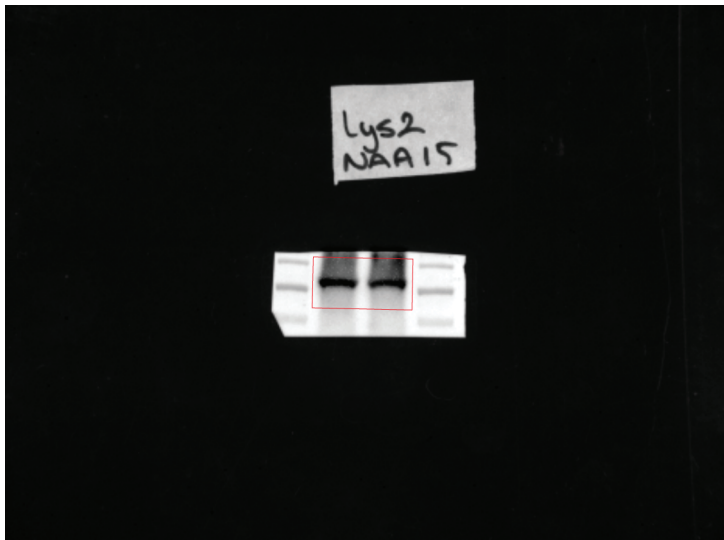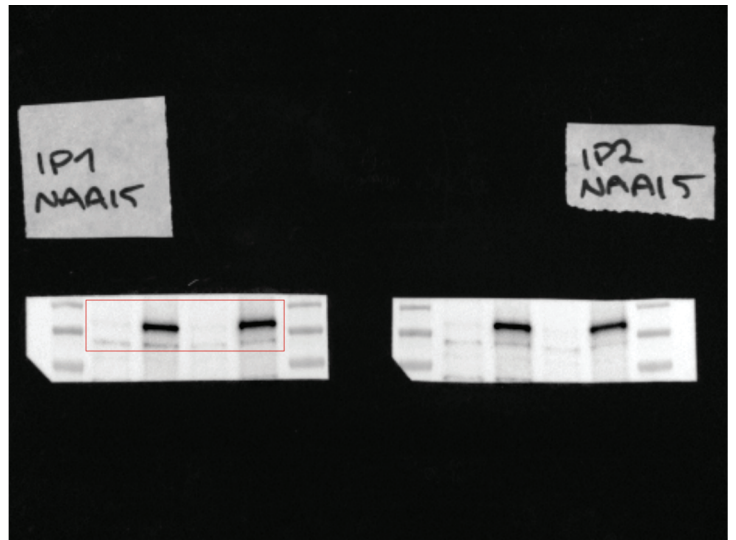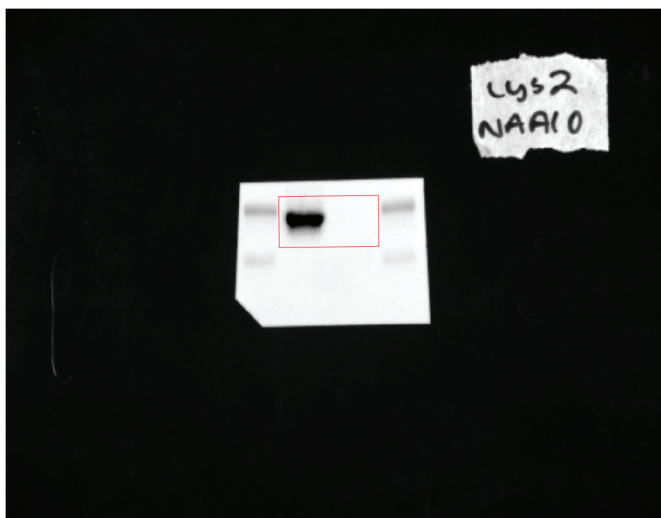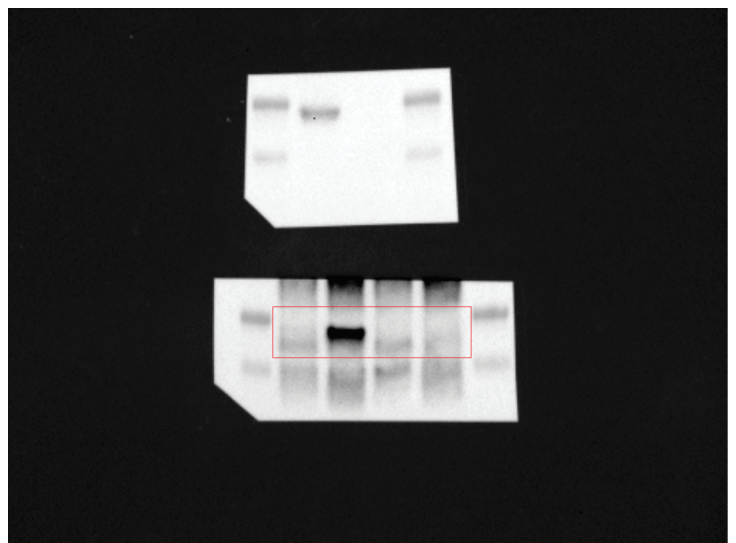

Supplement: supp [file elife-65952-supp-v1.zip › elife_poa_e65952_Figure_3_source_data_1.pdf]

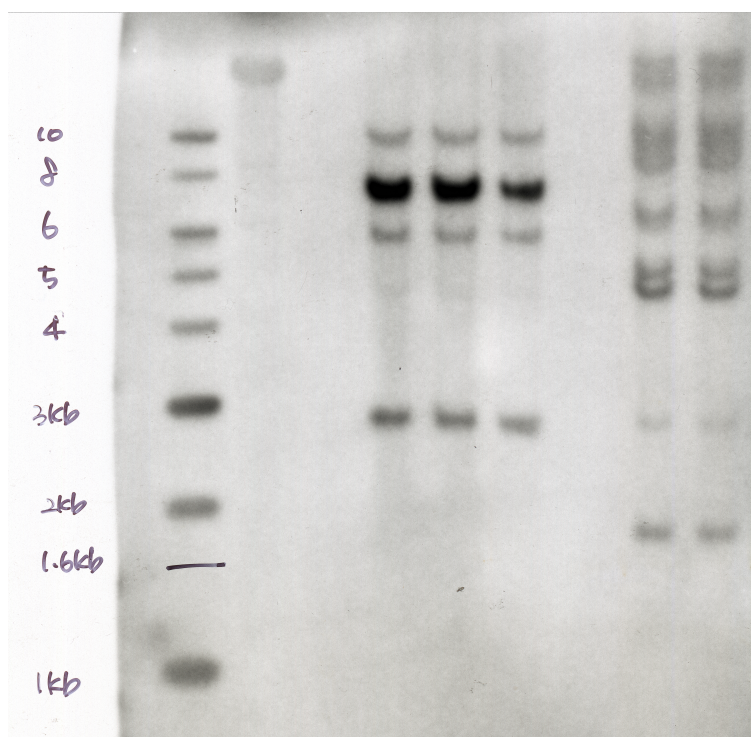

Supplement: supp [file elife-65952-supp-v1.zip › elife_poa_e65952_Figure_3_figure_supplement_1_source_data_1.pdf]

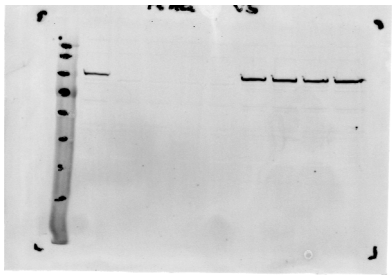

Supplement: supp [file elife-65952-supp-v1.zip › elife_poa_e65952_Figure_4_source_data_1.pdf]

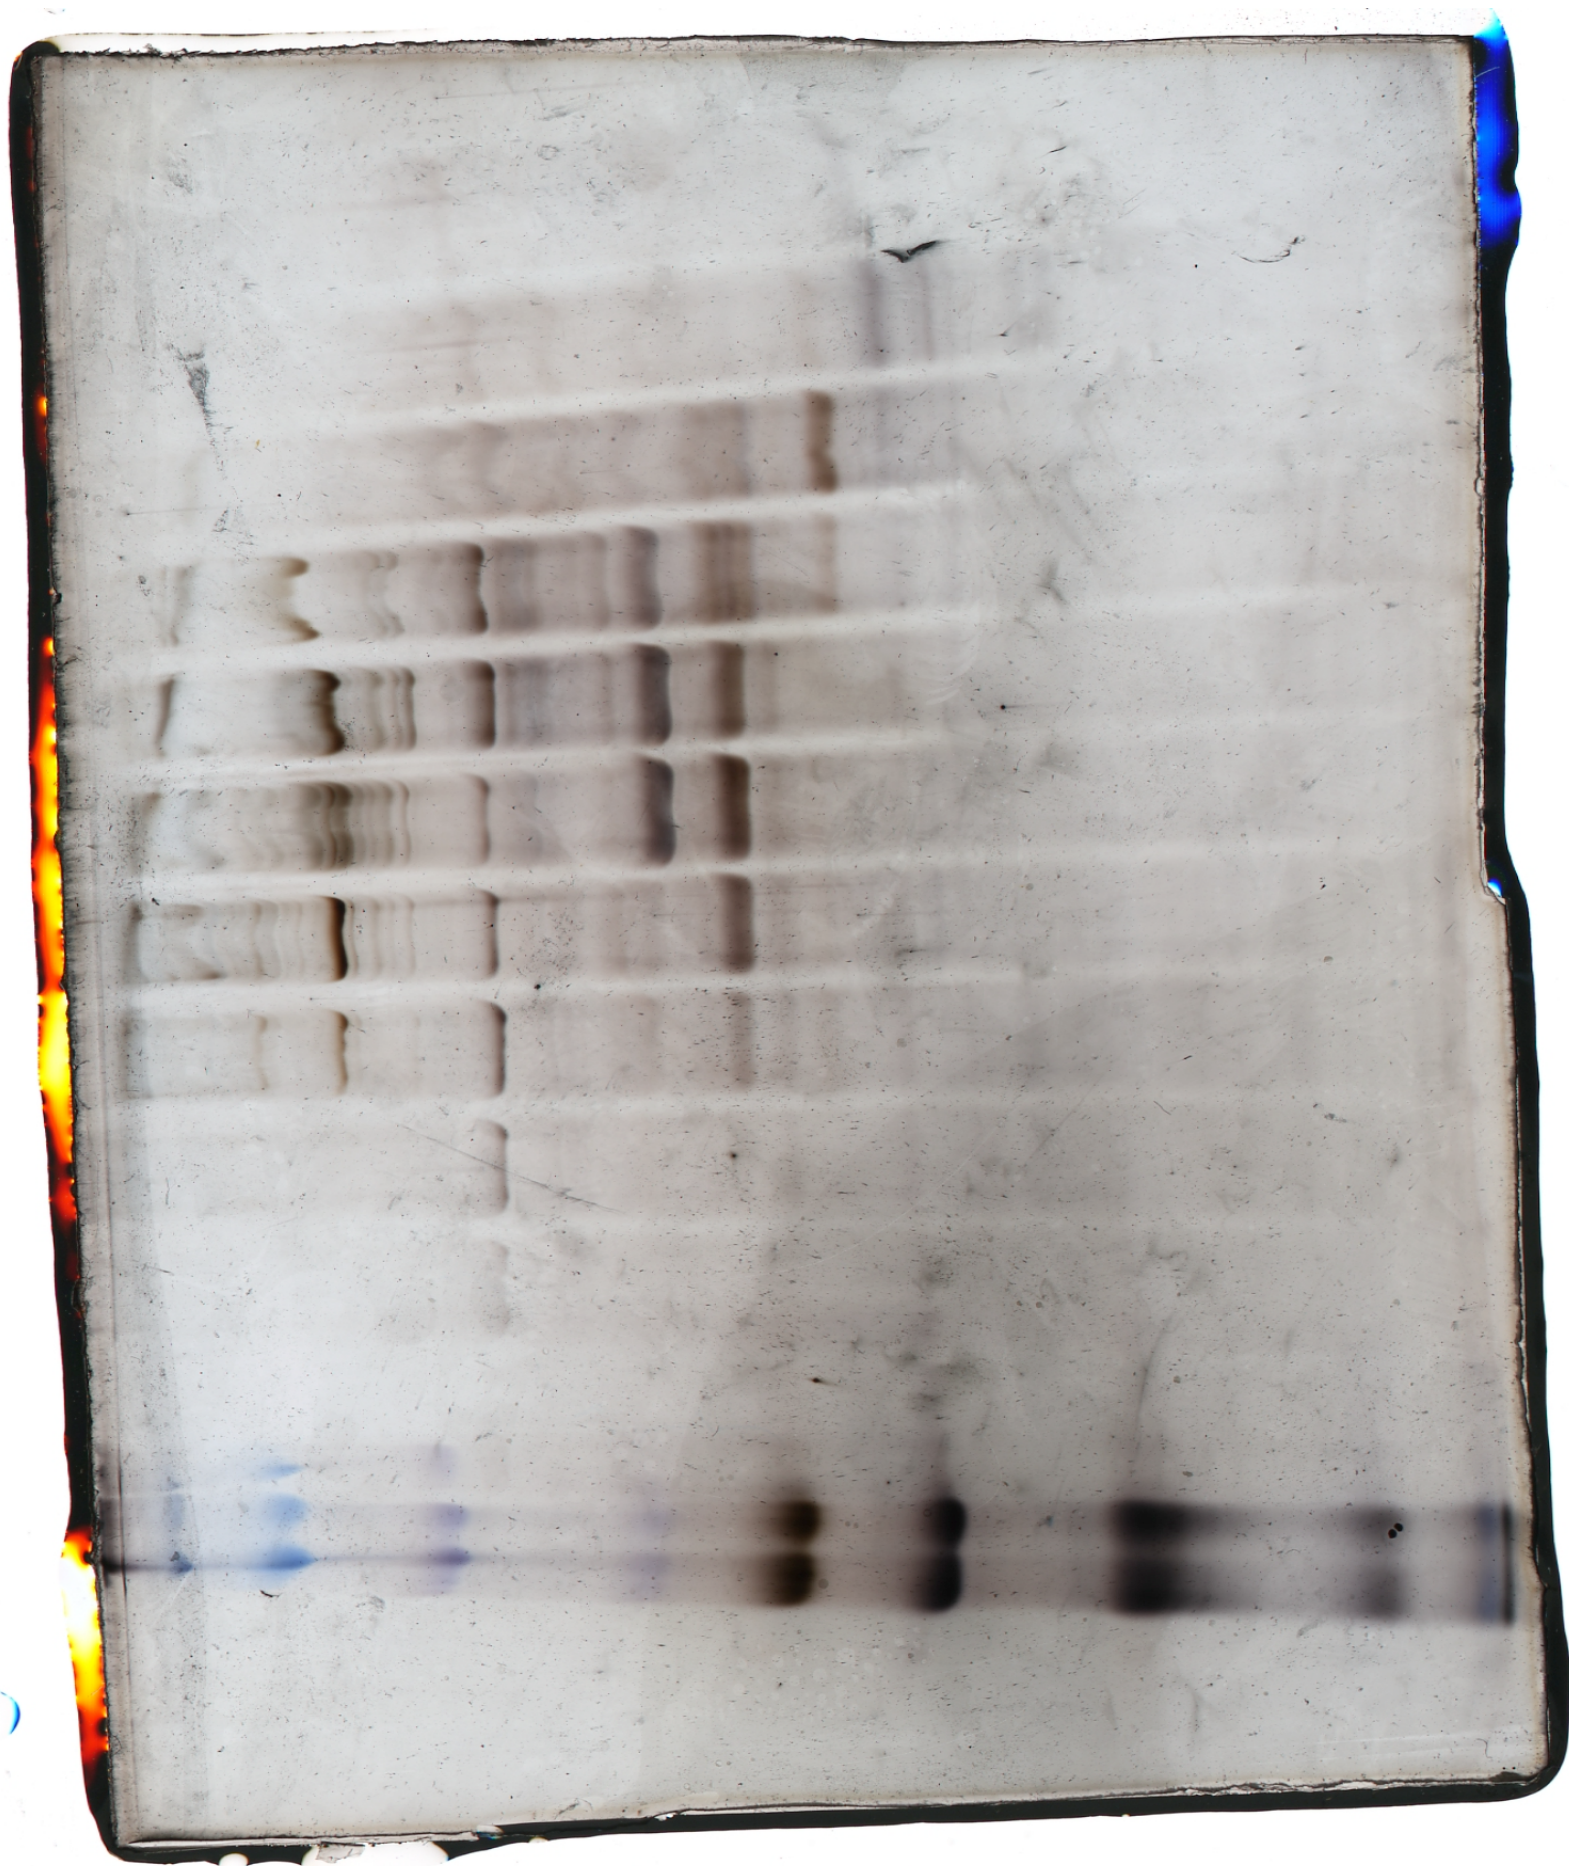

Supplement: supp [file elife-65952-supp-v1.zip › elife_poa_e65952_Figure_4_figure_supplement_1_source_data_1.pdf]

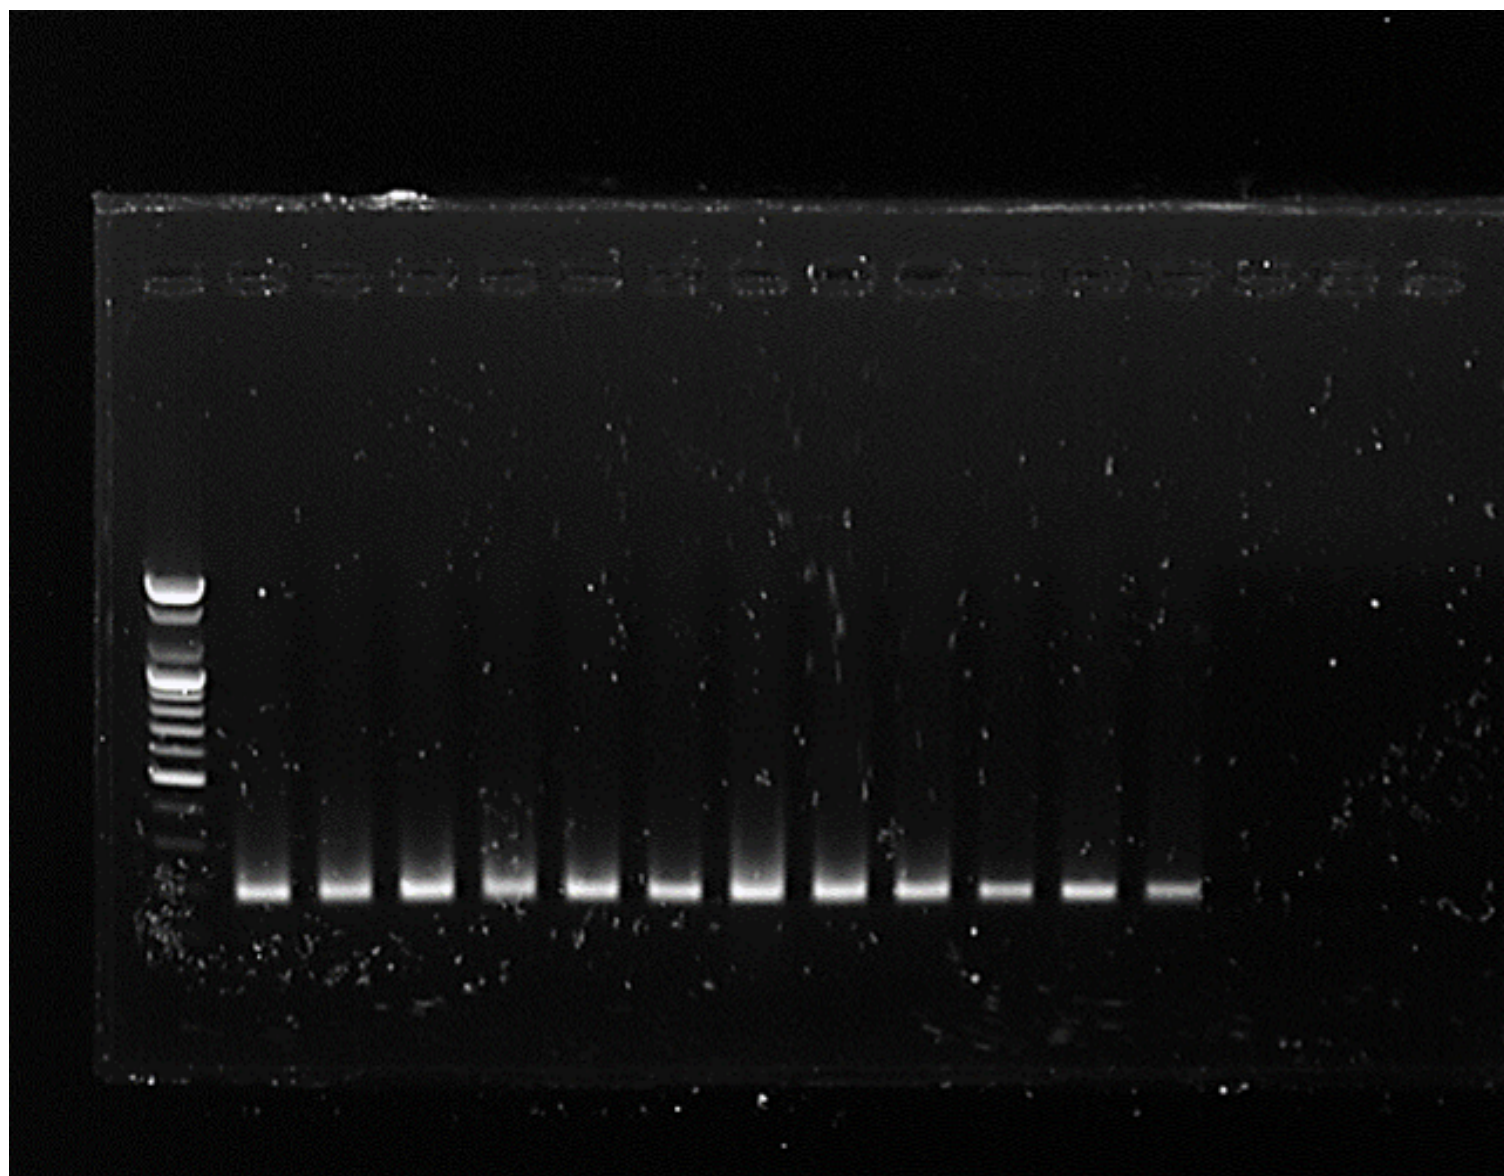

Supplement: supp [file elife-65952-supp-v1.zip › elife_poa_e65952_Figure_4_figure_supplement_1_source_data_2.pdf]

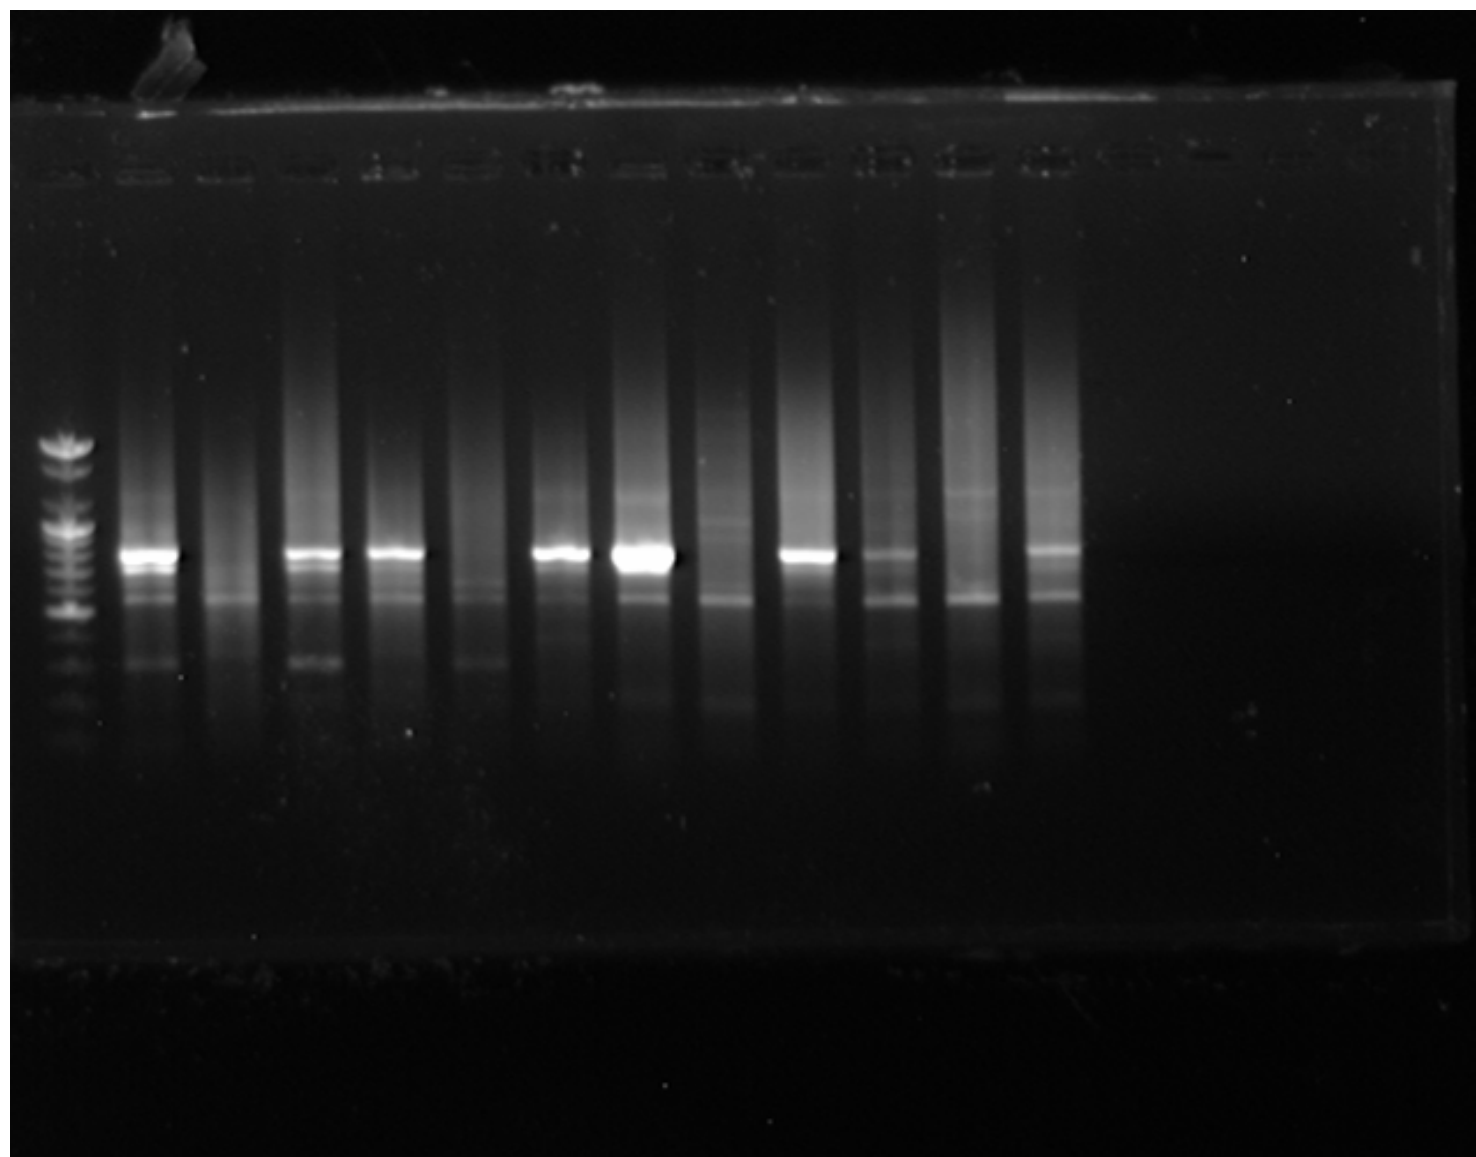

Supplement: supp [file elife-65952-supp-v1.zip › elife_poa_e65952_Figure_4_figure_supplement_1_source_code_1.pdf]

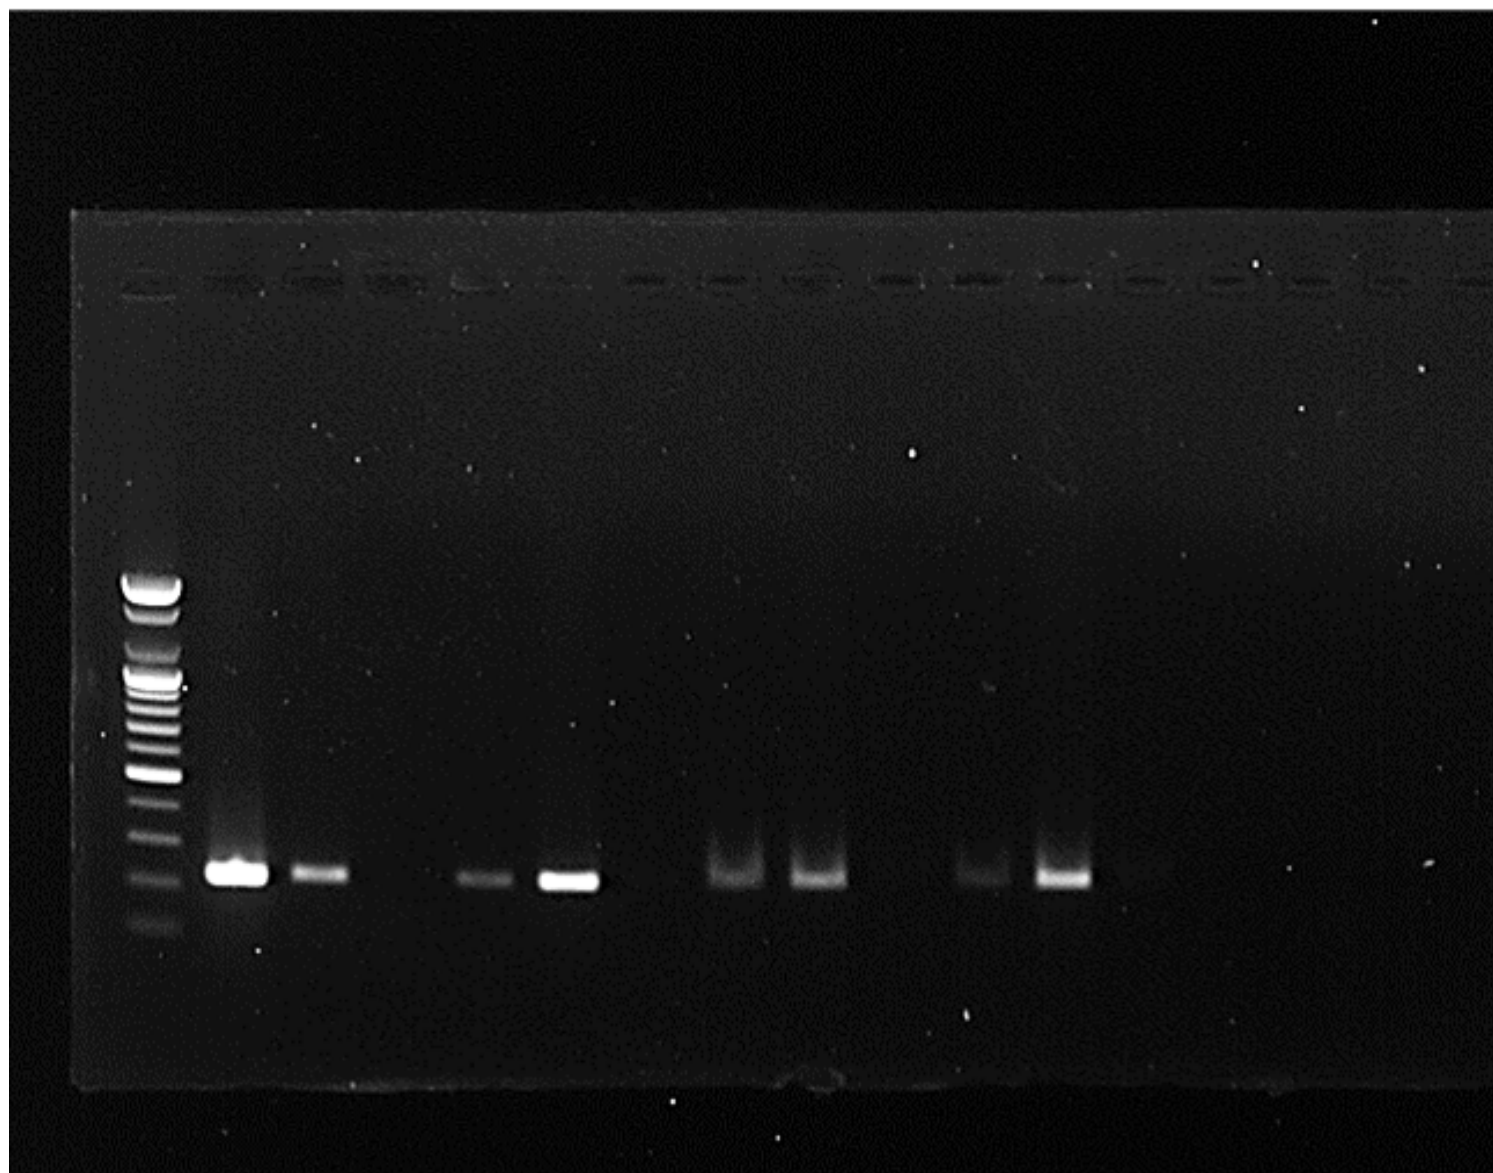

Supplement: supp [file elife-65952-supp-v1.zip › elife_poa_e65952_Figure_4_figure_supplement_1_source_code_2.pdf]

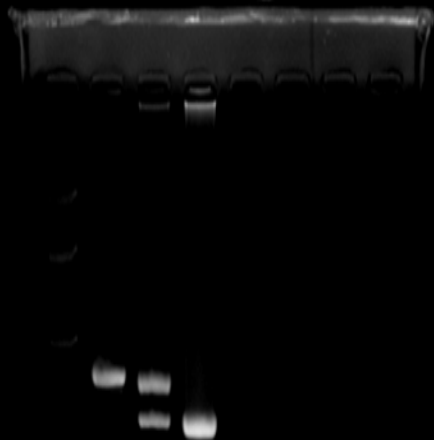

Supplement: supp [file elife-65952-supp-v1.zip › elife_poa_e65952_Figure_5_source_data_1.pdf]

Figure 6\_supplement  
figure 1

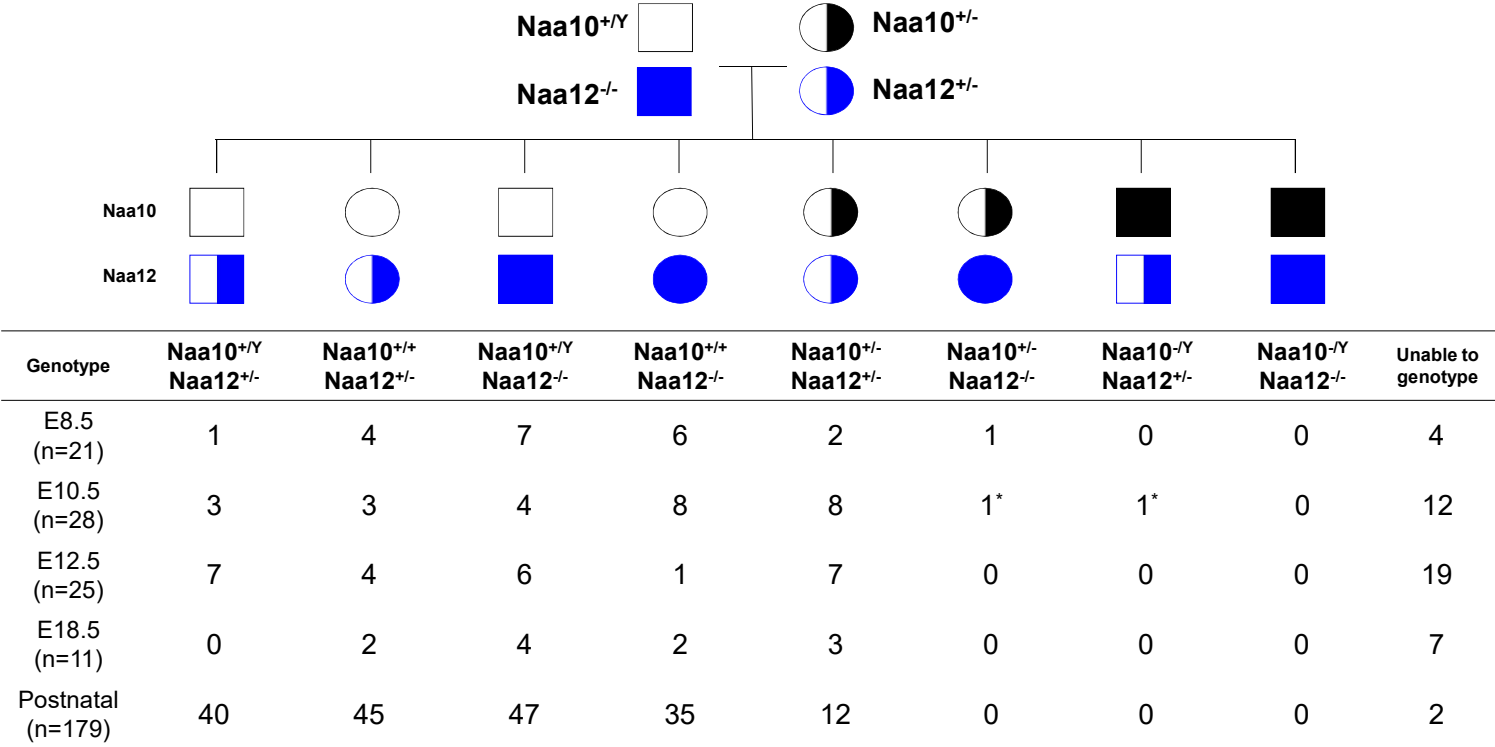

\* lysed embryo

Supplement: supp [file elife-65952-supp-v1.zip › elife_poa_e65952_Figure_6_figure_supplement_1.pdf]

Figure 6\_supplement figure 2

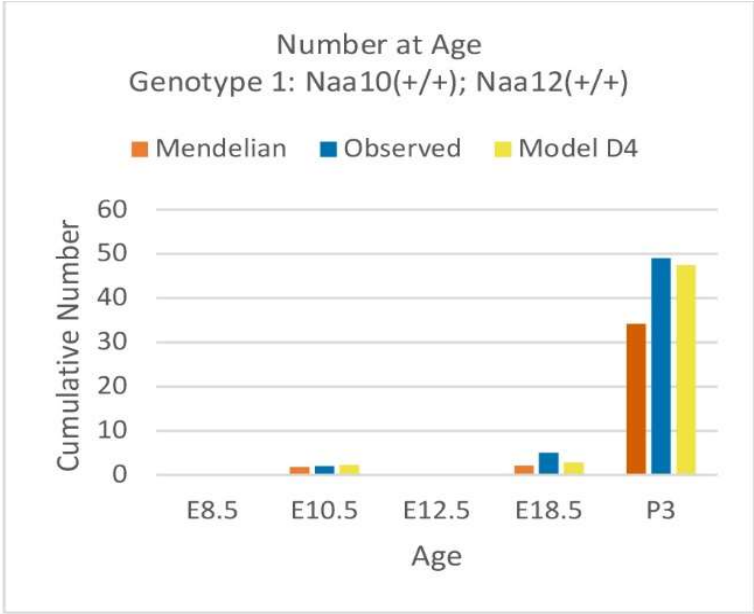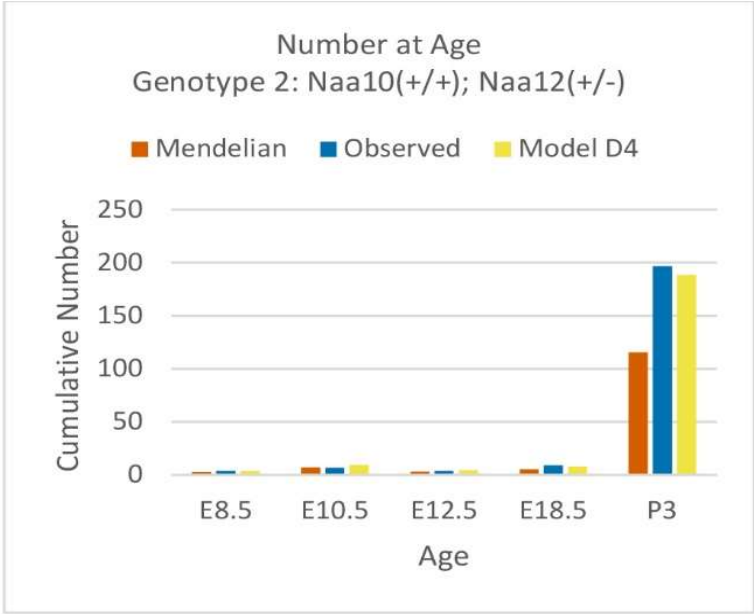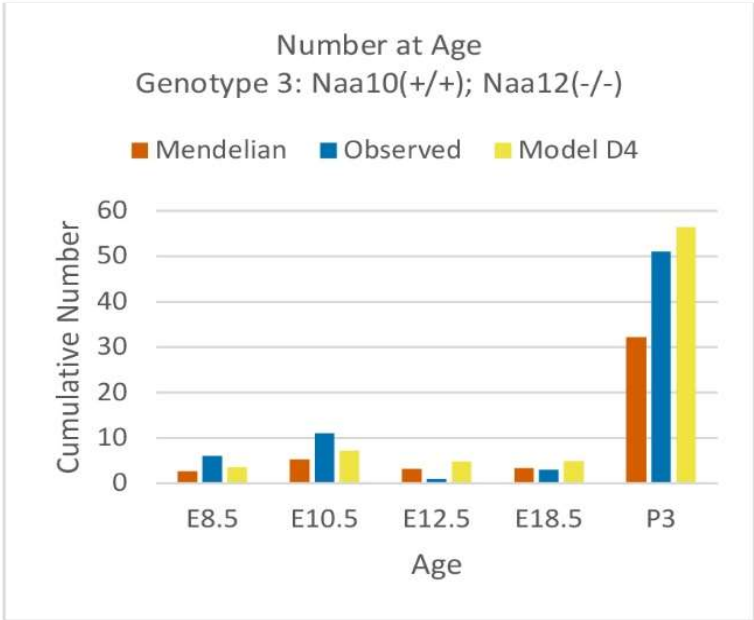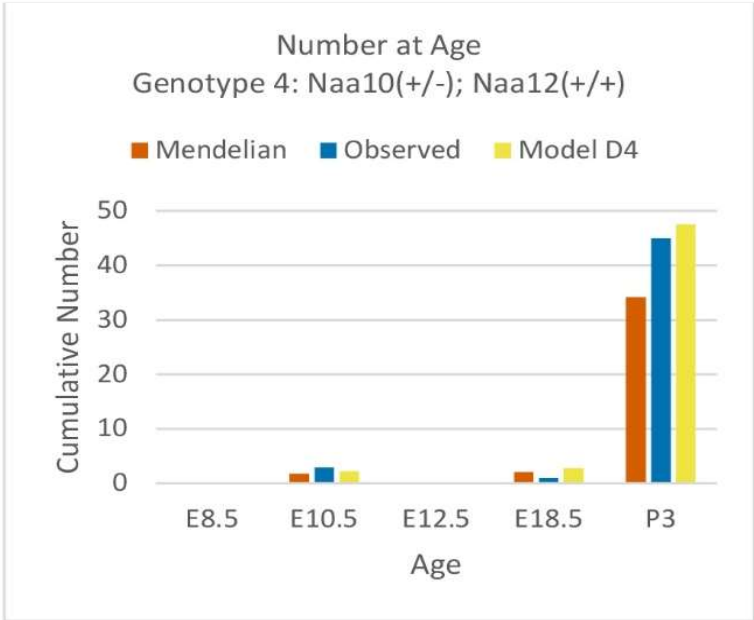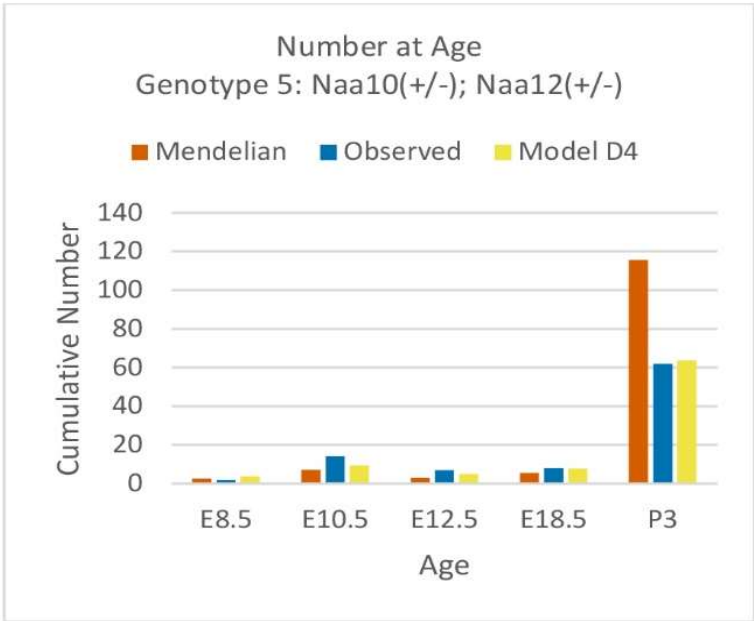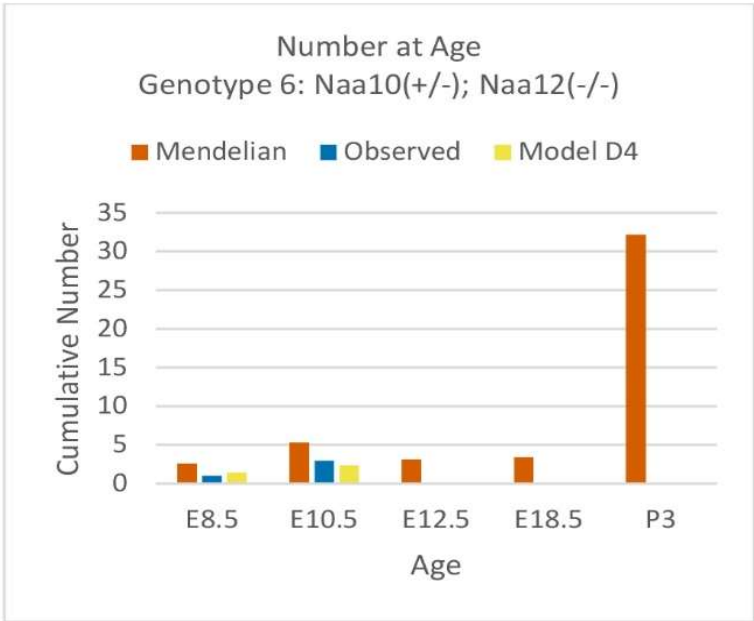

Supplement: supp [file elife-65952-supp-v1.zip › elife_poa_e65952_Figure_6_figure_supplement_2.pdf]

**Figure 6\_supplement  
figure 4**

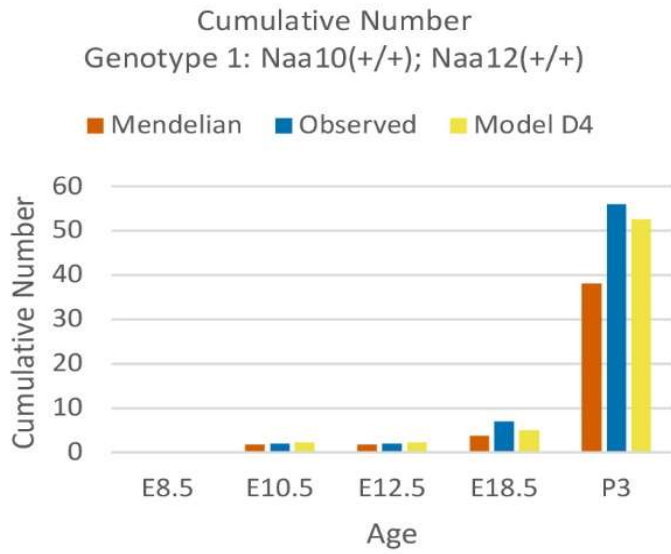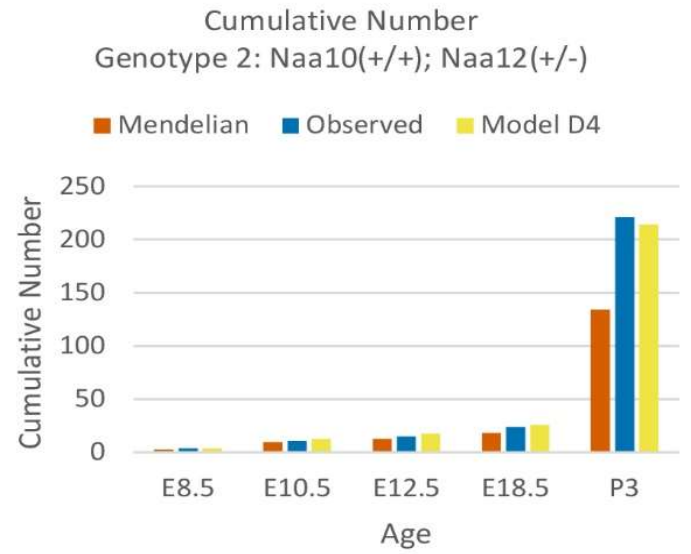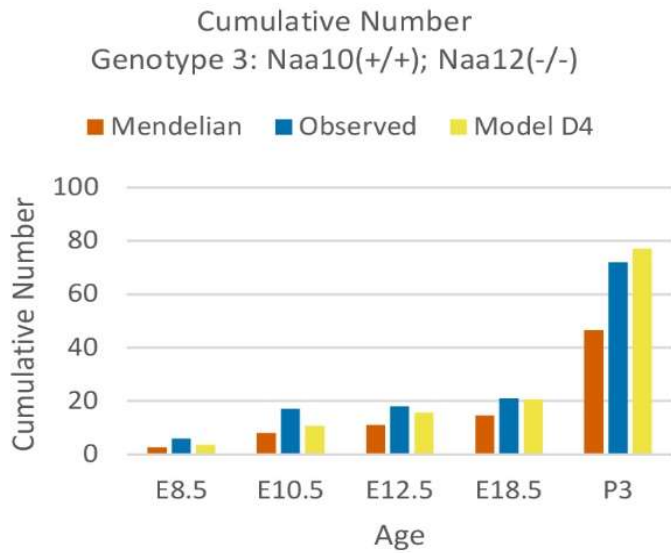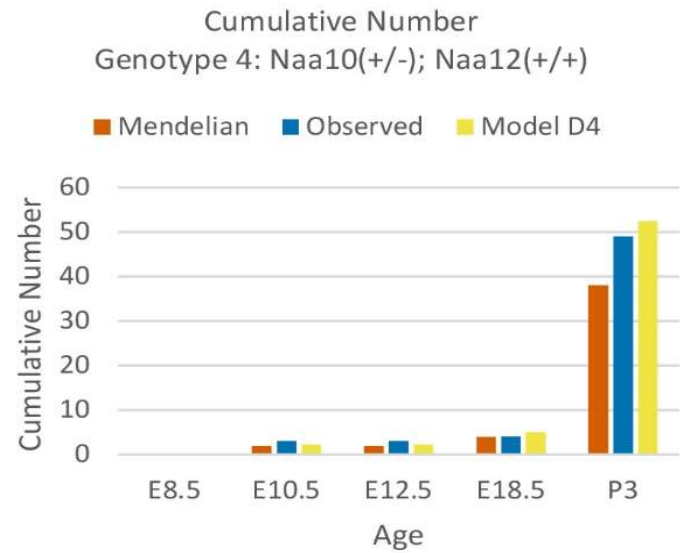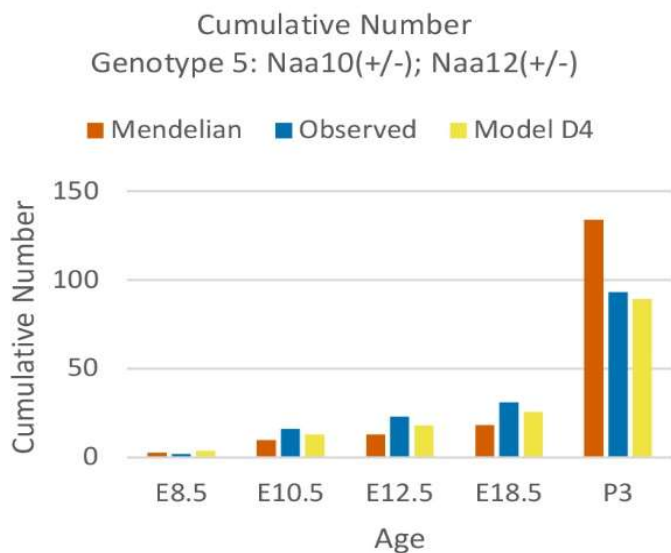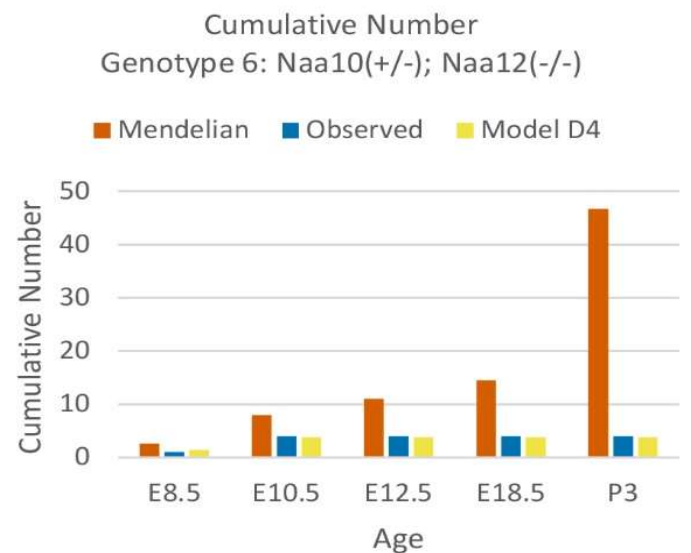

Supplement: supp [file elife-65952-supp-v1.zip › elife_poa_e65952_Figure_6_figure_supplement_4.pdf]

**Figure 6\_supplement  
figure 5**

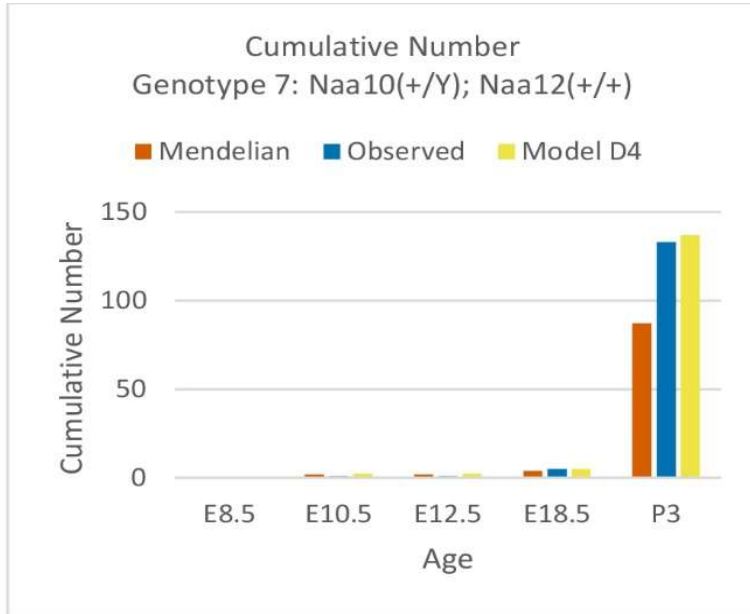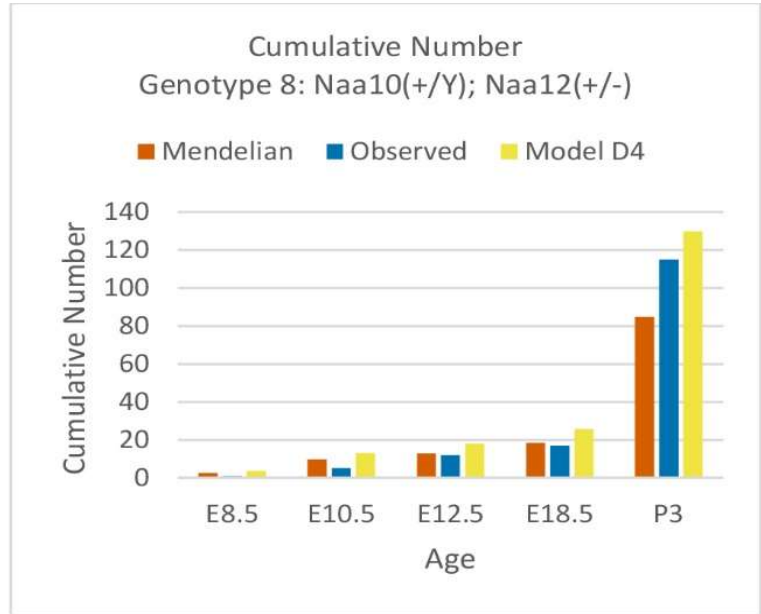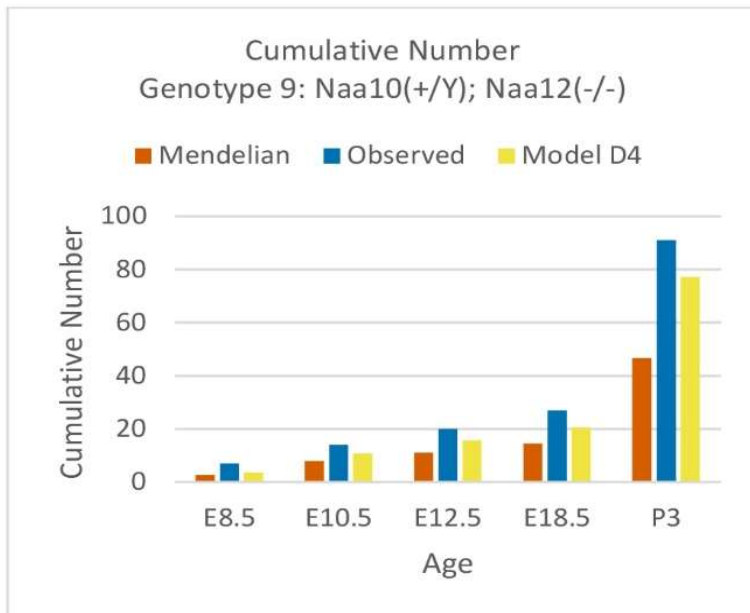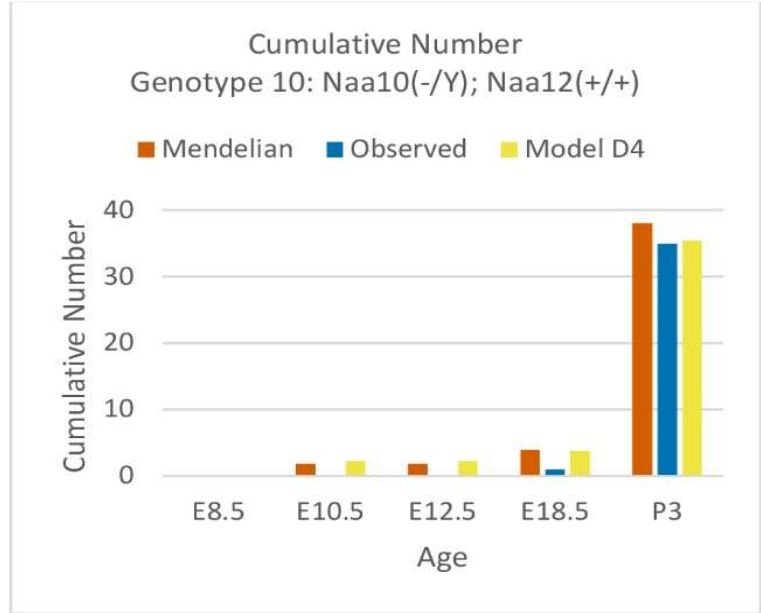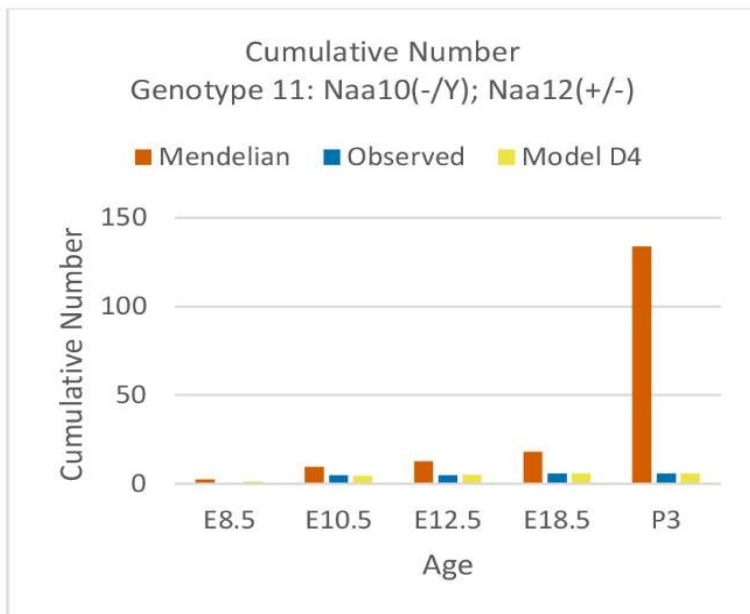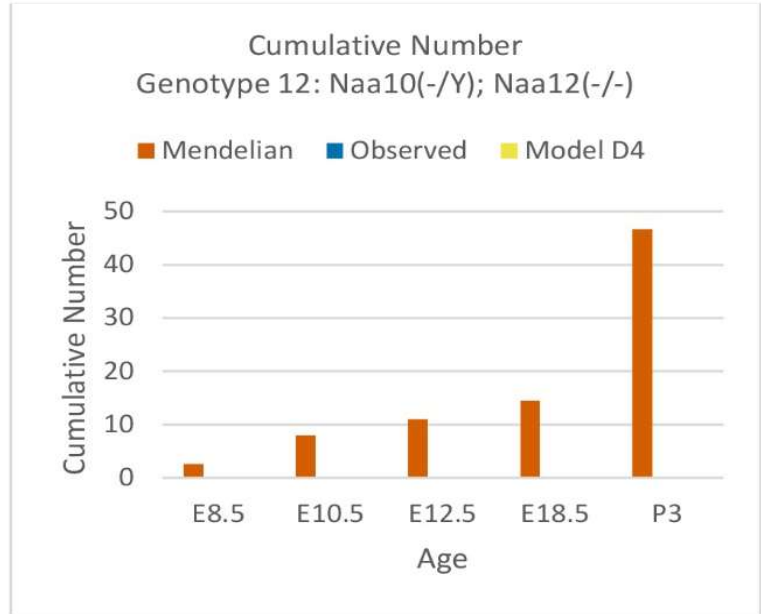

Supplement: supp [file elife-65952-supp-v1.zip › elife_poa_e65952_Figure_6_figure_supplement_5.pdf]
